# Supplementary material for: Network Pharmacology-Based Validation of the Efficacy of Huiyangjiuji Decoction in the Treatment of Experimental Colitis
Source: Front Pharmacol. 2021 May 28;12:666432. doi: 10.3389/fphar.2021.666432 (PMC8193934; doi:10.3389/fphar.2021.666432)
Supplement: Supplementary file 7 [file Table1.XLSX]

## Sheet: Sheet1
HYJJ comonents and targets
Atractylodes Macrocephala Koidz.	AMK	Targets	Mol ID	Molecule Name	MW	OB%	DL
MOL000022	14-acetyl-12-senecioyl-2E,8Z,10E-atractylentriol	Prostaglandin G/H synthase 2	MOL000020	12-senecioyl-2E,8E,10E-atractylentriol	312.39	62.4	0.22
MOL000033	(3S,8S,9S,10R,13R,14S,17R)-10,13-dimethyl-17-[(2R,5S)-5-propan-2-yloctan-2-yl]-2,3,4,7,8,9,11,12,14,15,16,17-dodecahydro-1H-cyclopenta[a]phenanthren-3-ol	Progesterone receptor	MOL000021	14-acetyl-12-senecioyl-2E,8E,10E-atractylentriol	355.44	60.31	0.31
MOL000049	3β-acetoxyatractylone	Muscarinic acetylcholine receptor M3	MOL000022	14-acetyl-12-senecioyl-2E,8Z,10E-atractylentriol	356.45	63.37	0.3
MOL000049	3β-acetoxyatractylone	Thrombin	MOL000028	α-Amyrin	426.8	39.51	0.76
MOL000049	3β-acetoxyatractylone	Muscarinic acetylcholine receptor M1	MOL000033	(3S,8S,9S,10R,13R,14S,17R)-10,13-dimethyl-17-[(2R,5S)-5-propan-2-yloctan-2-yl]-2,3,4,7,8,9,11,12,14,15,16,17-dodecahydro-1H-cyclopenta[a]phenanthren-3-ol	428.82	36.23	0.78
MOL000049	3β-acetoxyatractylone	Androgen receptor	MOL000049	3β-acetoxyatractylone	274.39	54.07	0.22
MOL000049	3β-acetoxyatractylone	Sodium channel protein type 5 subunit alpha	MOL000072	8β-ethoxy atractylenolide Ⅲ	276.41	35.95	0.21
MOL000049	3β-acetoxyatractylone	Prostaglandin G/H synthase 2
MOL000049	3β-acetoxyatractylone	Nitric-oxide synthase, endothelial
MOL000049	3β-acetoxyatractylone	Retinoic acid receptor RXR-alpha
MOL000049	3β-acetoxyatractylone	Acetylcholinesterase
MOL000049	3β-acetoxyatractylone	Alpha-1A adrenergic receptor
MOL000049	3β-acetoxyatractylone	Muscarinic acetylcholine receptor M2
MOL000049	3β-acetoxyatractylone	Beta-2 adrenergic receptor
MOL000049	3β-acetoxyatractylone	Mu-type opioid receptor
MOL000049	3β-acetoxyatractylone	Gamma-aminobutyric acid receptor subunit alpha-1
MOL000049	3β-acetoxyatractylone	Dipeptidyl peptidase IV
MOL000049	3β-acetoxyatractylone	Neuronal acetylcholine receptor protein, alpha-7 chain
MOL000072	8β-ethoxy atractylenolide Ⅲ	Prostaglandin G/H synthase 2
MOL000072	8β-ethoxy atractylenolide Ⅲ	Gamma-aminobutyric acid receptor subunit alpha-1
MOL000072	8β-ethoxy atractylenolide Ⅲ	Neuronal acetylcholine receptor protein, alpha-7 chain
MOL000072	8β-ethoxy atractylenolide Ⅲ	Nuclear receptor coactivator 2
MOL000072	8β-ethoxy atractylenolide Ⅲ	Nuclear receptor coactivator 1
Pinellia ternate (Thunb.) Breit.	PB		Mol ID	Molecule Name	MW	OB%	DL
MOL001755	24-Ethylcholest-4-en-3-one	Progesterone receptor	MOL001755	24-Ethylcholest-4-en-3-one	412.77	36.08	0.76
MOL001755	24-Ethylcholest-4-en-3-one	Mineralocorticoid receptor	MOL002670	Cavidine	353.45	35.64	0.81
MOL002670	Cavidine	Prostaglandin G/H synthase 1	MOL002714	baicalein	270.25	33.52	0.21
MOL002670	Cavidine	Muscarinic acetylcholine receptor M3	MOL002776	Baicalin	446.39	40.12	0.75
MOL002670	Cavidine	Potassium voltage-gated channel subfamily H member 2	MOL000358	beta-sitosterol	414.79	36.91	0.75
MOL002670	Cavidine	Muscarinic acetylcholine receptor M1	MOL000449	Stigmasterol	412.77	43.83	0.76
MOL002670	Cavidine	Beta-1 adrenergic receptor	MOL005030	gondoic acid	310.58	30.7	0.2
MOL002670	Cavidine	Sodium channel protein type 5 subunit alpha	MOL000519	coniferin	314.41	31.11	0.32
MOL002670	Cavidine	Coagulation factor Xa	MOL006936	10,13-eicosadienoic	308.56	39.99	0.2
MOL002670	Cavidine	Muscarinic acetylcholine receptor M5	MOL006937	12,13-epoxy-9-hydroxynonadeca-7,10-dienoic acid	324.51	42.15	0.24
MOL002670	Cavidine	Prostaglandin G/H synthase 2	MOL006957	(3S,6S)-3-(benzyl)-6-(4-hydroxybenzyl)piperazine-2,5-quinone	310.38	46.89	0.27
MOL002670	Cavidine	5-hydroxytryptamine receptor 3A	MOL003578	Cycloartenol	426.8	38.69	0.78
MOL002670	Cavidine	Alpha-2C adrenergic receptor	MOL006967	beta-D-Ribofuranoside, xanthine-9	284.26	44.72	0.21
MOL002670	Cavidine	Muscarinic acetylcholine receptor M4
MOL002670	Cavidine	Retinoic acid receptor RXR-alpha
MOL002670	Cavidine	Delta-type opioid receptor
MOL002670	Cavidine	5-hydroxytryptamine 2A receptor
MOL002670	Cavidine	5-hydroxytryptamine 2C receptor
MOL002670	Cavidine	Alpha-1B adrenergic receptor
MOL002670	Cavidine	Beta-2 adrenergic receptor
MOL002670	Cavidine	Alpha-1D adrenergic receptor
MOL002670	Cavidine	DNA topoisomerase II
MOL002670	Cavidine	Mu-type opioid receptor
MOL002670	Cavidine	Heat shock protein HSP 90
MOL002670	Cavidine	Retinoic acid receptor RXR-beta
MOL002670	Cavidine	Calmodulin
MOL002670	Cavidine	Dopamine D1 receptor
MOL002670	Cavidine	Sodium-dependent serotonin transporter
MOL002670	Cavidine	Coagulation factor VII
MOL002670	Cavidine	cAMP and cAMP-inhibited cGMP 3',5'-cyclic phosphodiesterase 10A
MOL002714	baicalein	Prostaglandin G/H synthase 1
MOL002714	baicalein	Androgen receptor
MOL002714	baicalein	Prostaglandin G/H synthase 2
MOL002714	baicalein	Heat shock protein HSP 90
MOL002714	baicalein	mRNA of PKA Catalytic Subunit C-alpha
MOL002714	baicalein	Dipeptidyl peptidase IV
MOL002714	baicalein	Phosphatidylinositol-4,5-bisphosphate 3-kinase catalytic subunit, gamma isoform
MOL002714	baicalein	CGMP-inhibited 3',5'-cyclic phosphodiesterase A
MOL002714	baicalein	Trypsin-1
MOL002714	baicalein	Nuclear receptor coactivator 2
MOL002714	baicalein	Nuclear receptor coactivator 1
MOL002714	baicalein	Calmodulin
MOL002714	baicalein	Transcription factor p65
MOL002714	baicalein	RAC-alpha serine/threonine-protein kinase
MOL002714	baicalein	Vascular endothelial growth factor A
MOL002714	baicalein	Apoptosis regulator Bcl-2
MOL002714	baicalein	Proto-oncogene c-Fos
MOL002714	baicalein	Apoptosis regulator BAX
MOL002714	baicalein	Matrix metalloproteinase-9
MOL002714	baicalein	Caspase-3
MOL002714	baicalein	Cellular tumor antigen p53
MOL002714	baicalein	Hypoxia-inducible factor 1-alpha
MOL002714	baicalein	Fos-related antigen 1
MOL002714	baicalein	Fos-related antigen 2
MOL002714	baicalein	Cell division control protein 2 homolog
MOL002714	baicalein	G2/mitotic-specific cyclin-B1
MOL002714	baicalein	Myeloperoxidase
MOL002714	baicalein	Aryl hydrocarbon receptor
MOL002714	baicalein	Insulin-like growth factor II
MOL002714	baicalein	Cytochrome c
MOL002714	baicalein	Arachidonate 12-lipoxygenase, 12S-type
MOL002714	baicalein	Nuclear factor of activated T-cells, cytoplasmic 1
MOL002714	baicalein	Tudor domain-containing protein 7
MOL002714	baicalein	Egl nine homolog 1
MOL002714	baicalein	NADPH oxidase 5
MOL002714	baicalein	Fatty acid-binding protein, epidermal
MOL002714	baicalein	Apolipoprotein D
MOL002776	Baicalin	Coagulation factor Xa
MOL002776	Baicalin	mRNA of Protein-tyrosine phosphatase, non-receptor type 1
MOL000358	beta-sitosterol	Progesterone receptor
MOL000358	beta-sitosterol	Nuclear receptor coactivator 2
MOL000358	beta-sitosterol	Prostaglandin G/H synthase 1
MOL000358	beta-sitosterol	Prostaglandin G/H synthase 2
MOL000358	beta-sitosterol	Heat shock protein HSP 90
MOL000358	beta-sitosterol	Phosphatidylinositol-4,5-bisphosphate 3-kinase catalytic subunit, gamma isoform
MOL000358	beta-sitosterol	Potassium voltage-gated channel subfamily H member 2
MOL000358	beta-sitosterol	mRNA of PKA Catalytic Subunit C-alpha
MOL000358	beta-sitosterol	Dopamine D1 receptor
MOL000358	beta-sitosterol	Muscarinic acetylcholine receptor M3
MOL000358	beta-sitosterol	Muscarinic acetylcholine receptor M1
MOL000358	beta-sitosterol	Sodium channel protein type 5 subunit alpha
MOL000358	beta-sitosterol	Gamma-aminobutyric-acid receptor alpha-2 subunit
MOL000358	beta-sitosterol	Muscarinic acetylcholine receptor M4
MOL000358	beta-sitosterol	CGMP-inhibited 3',5'-cyclic phosphodiesterase A
MOL000358	beta-sitosterol	5-hydroxytryptamine 2A receptor
MOL000358	beta-sitosterol	Gamma-aminobutyric-acid receptor alpha-5 subunit
MOL000358	beta-sitosterol	Alpha-1A adrenergic receptor
MOL000358	beta-sitosterol	Gamma-aminobutyric-acid receptor alpha-3 subunit
MOL000358	beta-sitosterol	Muscarinic acetylcholine receptor M2
MOL000358	beta-sitosterol	Alpha-1B adrenergic receptor
MOL000358	beta-sitosterol	Beta-2 adrenergic receptor
MOL000358	beta-sitosterol	Neuronal acetylcholine receptor subunit alpha-2
MOL000358	beta-sitosterol	Sodium-dependent serotonin transporter
MOL000358	beta-sitosterol	Mu-type opioid receptor
MOL000358	beta-sitosterol	Gamma-aminobutyric acid receptor subunit alpha-1
MOL000358	beta-sitosterol	Neuronal acetylcholine receptor protein, alpha-7 chain
MOL000358	beta-sitosterol	Cytochrome P450-cam
MOL000358	beta-sitosterol	Apoptosis regulator Bcl-2
MOL000358	beta-sitosterol	Apoptosis regulator BAX
MOL000358	beta-sitosterol	Caspase-9
MOL000358	beta-sitosterol	Transcription factor AP-1
MOL000358	beta-sitosterol	Caspase-3
MOL000358	beta-sitosterol	Caspase-8
MOL000358	beta-sitosterol	Protein kinase C alpha type
MOL000358	beta-sitosterol	Transforming growth factor beta-1
MOL000358	beta-sitosterol	Serum paraoxonase/arylesterase 1
MOL000358	beta-sitosterol	Microtubule-associated protein 2
MOL000449	Stigmasterol	Progesterone receptor
MOL000449	Stigmasterol	Mineralocorticoid receptor
MOL000449	Stigmasterol	Nuclear receptor coactivator 2
MOL000449	Stigmasterol	Alcohol dehydrogenase 1C
MOL000449	Stigmasterol	Ig gamma-1 chain C region
MOL000449	Stigmasterol	Retinoic acid receptor RXR-alpha
MOL000449	Stigmasterol	Nuclear receptor coactivator 1
MOL000449	Stigmasterol	Prostaglandin G/H synthase 1
MOL000449	Stigmasterol	Prostaglandin G/H synthase 2
MOL000449	Stigmasterol	Alpha-2A adrenergic receptor
MOL000449	Stigmasterol	Sodium-dependent noradrenaline transporter
MOL000449	Stigmasterol	Sodium-dependent dopamine transporter
MOL000449	Stigmasterol	Beta-2 adrenergic receptor
MOL000449	Stigmasterol	Aldose reductase
MOL000449	Stigmasterol	Urokinase-type plasminogen activator
MOL000449	Stigmasterol	Leukotriene A-4 hydrolase
MOL000449	Stigmasterol	Amine oxidase [flavin-containing] B
MOL000449	Stigmasterol	Amine oxidase [flavin-containing] A
MOL000449	Stigmasterol	mRNA of PKA Catalytic Subunit C-alpha
MOL000449	Stigmasterol	Chymotrypsinogen B
MOL000449	Stigmasterol	Muscarinic acetylcholine receptor M3
MOL000449	Stigmasterol	Muscarinic acetylcholine receptor M1
MOL000449	Stigmasterol	Beta-1 adrenergic receptor
MOL000449	Stigmasterol	Sodium channel protein type 5 subunit alpha
MOL000449	Stigmasterol	5-hydroxytryptamine 2A receptor
MOL000449	Stigmasterol	Alpha-1A adrenergic receptor
MOL000449	Stigmasterol	Gamma-aminobutyric-acid receptor alpha-3 subunit
MOL000449	Stigmasterol	Muscarinic acetylcholine receptor M2
MOL000449	Stigmasterol	Alpha-1B adrenergic receptor
MOL000449	Stigmasterol	Gamma-aminobutyric acid receptor subunit alpha-1
MOL000449	Stigmasterol	Neuronal acetylcholine receptor protein, alpha-7 chain
MOL005030	gondoic acid	Prostaglandin G/H synthase 1
MOL005030	gondoic acid	Nuclear receptor coactivator 2
MOL000519	coniferin	Muscarinic acetylcholine receptor M3
MOL000519	coniferin	Muscarinic acetylcholine receptor M1
MOL000519	coniferin	Estrogen receptor
MOL000519	coniferin	Androgen receptor
MOL000519	coniferin	Sodium channel protein type 5 subunit alpha
MOL000519	coniferin	Peroxisome proliferator activated receptor gamma
MOL000519	coniferin	Prostaglandin G/H synthase 2
MOL000519	coniferin	Carbonic anhydrase II
MOL000519	coniferin	CGMP-inhibited 3',5'-cyclic phosphodiesterase A
MOL000519	coniferin	Alpha-1B adrenergic receptor
MOL000519	coniferin	Beta-2 adrenergic receptor
MOL000519	coniferin	Alpha-1D adrenergic receptor
MOL000519	coniferin	DNA topoisomerase II
MOL000519	coniferin	Mu-type opioid receptor
MOL000519	coniferin	Cell division protein kinase 2
MOL000519	coniferin	Beta-lactamase
MOL000519	coniferin	Neuronal acetylcholine receptor protein, alpha-7 chain
MOL000519	coniferin	Ig gamma-1 chain C region
MOL000519	coniferin	Proto-oncogene serine/threonine-protein kinase Pim-1
MOL000519	coniferin	Cyclin-A2
MOL000519	coniferin	Nuclear receptor coactivator 2
MOL000519	coniferin	Nuclear receptor coactivator 1
MOL006936	10,13-eicosadienoic	Prostaglandin G/H synthase 1
MOL006936	10,13-eicosadienoic	Nuclear receptor coactivator 2
MOL006957	(3S,6S)-3-(benzyl)-6-(4-hydroxybenzyl)piperazine-2,5-quinone	Androgen receptor
MOL006957	(3S,6S)-3-(benzyl)-6-(4-hydroxybenzyl)piperazine-2,5-quinone	Prostaglandin G/H synthase 2
MOL006957	(3S,6S)-3-(benzyl)-6-(4-hydroxybenzyl)piperazine-2,5-quinone	Beta-2 adrenergic receptor
MOL006957	(3S,6S)-3-(benzyl)-6-(4-hydroxybenzyl)piperazine-2,5-quinone	Calmodulin
MOL003578	Cycloartenol	Mineralocorticoid receptor
MOL006967	beta-D-Ribofuranoside, xanthine-9	Purine nucleoside phosphorylase
MOL006967	beta-D-Ribofuranoside, xanthine-9	Prostaglandin G/H synthase 2
MOL006967	beta-D-Ribofuranoside, xanthine-9	Purine nucleoside phosphorylase deoD-type
Schisandrae Chinensis Fructus	SCF		Mol ID	Molecule Name	MW	OB%	DL
MOL004624	Longikaurin A	Muscarinic acetylcholine receptor M1	MOL004624	Longikaurin A	348.48	47.72	0.53
MOL004624	Longikaurin A	Gamma-aminobutyric-acid receptor alpha-2 subunit	MOL005317	Deoxyharringtonine	515.66	39.27	0.81
MOL004624	Longikaurin A	Gamma-aminobutyric-acid receptor alpha-3 subunit	MOL008956	Angeloylgomisin O	498.62	31.97	0.85
MOL004624	Longikaurin A	Muscarinic acetylcholine receptor M2	MOL008957	Schizandrer B	514.62	30.71	0.83
MOL004624	Longikaurin A	Trypsin-1	MOL008968	Gomisin-A	416.51	30.69	0.78
MOL004624	Longikaurin A	Gamma-aminobutyric-acid receptor subunit alpha-6	MOL008974	Gomisin G	508.61	32.68	0.83
MOL005317	Deoxyharringtonine	Androgen receptor	MOL008978	Gomisin R	400.46	34.84	0.86
MOL005317	Deoxyharringtonine	Mineralocorticoid receptor	MOL008992	Wuweizisu C	384.46	46.27	0.84
MOL008956	Angeloylgomisin O	Androgen receptor
MOL008956	Angeloylgomisin O	Coagulation factor Xa
MOL008956	Angeloylgomisin O	DNA topoisomerase II
MOL008957	Schizandrer B	Prostaglandin G/H synthase 2
MOL008957	Schizandrer B	DNA topoisomerase II
MOL008968	Gomisin-A	Thrombin
MOL008968	Gomisin-A	Nitric-oxide synthase, endothelial
MOL008968	Gomisin-A	Acetylcholinesterase
MOL008974	Gomisin G	DNA topoisomerase II
MOL008978	Gomisin R	Estrogen receptor
MOL008978	Gomisin R	Androgen receptor
MOL008978	Gomisin R	Coagulation factor Xa
MOL008978	Gomisin R	Prostaglandin G/H synthase 2
MOL008978	Gomisin R	DNA topoisomerase II
MOL008978	Gomisin R	Trypsin-1
MOL008978	Gomisin R	Proto-oncogene serine/threonine-protein kinase Pim-1
MOL008978	Gomisin R	Nuclear receptor coactivator 2
MOL008978	Gomisin R	Calcium-activated potassium channel subunit alpha 1
MOL008992	Wuweizisu C	Acetylcholinesterase
MOL008992	Wuweizisu C	Gamma-aminobutyric acid receptor subunit alpha-1
MOL008992	Wuweizisu C	Dipeptidyl peptidase IV
MOL008992	Wuweizisu C	Cytochrome P450-cam
Citrus Reticulata	CR		Mol ID	Molecule Name	MW	OB%	DL
MOL000359	sitosterol	Progesterone receptor	MOL000359	sitosterol	414.79	36.91	0.75
MOL000359	sitosterol	Nuclear receptor coactivator 2	MOL004328	naringenin	272.27	59.29	0.21
MOL000359	sitosterol	Mineralocorticoid receptor	MOL005100	5,7-dihydroxy-2-(3-hydroxy-4-methoxyphenyl)chroman-4-one	302.3	47.74	0.27
MOL004328	naringenin	Prostaglandin G/H synthase 1	MOL005815	Citromitin	404.45	86.9	0.51
MOL004328	naringenin	Estrogen receptor	MOL005828	nobiletin	402.43	61.67	0.52
MOL004328	naringenin	Prostaglandin G/H synthase 2
MOL004328	naringenin	Heat shock protein HSP 90
MOL004328	naringenin	Beta-lactamase
MOL004328	naringenin	mRNA of PKA Catalytic Subunit C-alpha
MOL004328	naringenin	Phosphatidylinositol-4,5-bisphosphate 3-kinase catalytic subunit, gamma isoform
MOL004328	naringenin	Transcription factor p65
MOL004328	naringenin	RAC-alpha serine/threonine-protein kinase
MOL004328	naringenin	Apoptosis regulator Bcl-2
MOL004328	naringenin	Mitogen-activated protein kinase 3
MOL004328	naringenin	Mitogen-activated protein kinase 1
MOL004328	naringenin	Caspase-3
MOL004328	naringenin	Fatty acid synthase
MOL004328	naringenin	Low-density lipoprotein receptor
MOL004328	naringenin	Bcl2 antagonist of cell death
MOL004328	naringenin	Superoxide dismutase [Cu-Zn]
MOL004328	naringenin	Catalase
MOL004328	naringenin	Peroxisome proliferator-activated receptor gamma
MOL004328	naringenin	Microsomal triglyceride transfer protein large subunit
MOL004328	naringenin	Apolipoprotein B-100
MOL004328	naringenin	Phospholipase B1, membrane-associated
MOL004328	naringenin	3-hydroxy-3-methylglutaryl-coenzyme A reductase
MOL004328	naringenin	Cytochrome P450 19A1
MOL004328	naringenin	Glutathione S-transferase P
MOL004328	naringenin	UDP-glucuronosyltransferase 1-1
MOL004328	naringenin	Peroxisome proliferator-activated receptor alpha
MOL004328	naringenin	Sterol regulatory element-binding protein 1
MOL004328	naringenin	Glutathione reductase, mitochondrial
MOL004328	naringenin	Multidrug resistance-associated protein 1
MOL004328	naringenin	Adiponectin
MOL004328	naringenin	Sterol O-acyltransferase 2
MOL004328	naringenin	Aldo-keto reductase family 1 member C1
MOL004328	naringenin	Aspartate aminotransferase, cytoplasmic
MOL004328	naringenin	4-aminobutyrate aminotransferase, mitochondrial
MOL004328	naringenin	Liver carboxylesterase 1
MOL004328	naringenin	Sterol O-acyltransferase 1
MOL005100	5,7-dihydroxy-2-(3-hydroxy-4-methoxyphenyl)chroman-4-one	Prostaglandin G/H synthase 1
MOL005100	5,7-dihydroxy-2-(3-hydroxy-4-methoxyphenyl)chroman-4-one	Prostaglandin G/H synthase 2
MOL005100	5,7-dihydroxy-2-(3-hydroxy-4-methoxyphenyl)chroman-4-one	Heat shock protein HSP 90
MOL005100	5,7-dihydroxy-2-(3-hydroxy-4-methoxyphenyl)chroman-4-one	mRNA of PKA Catalytic Subunit C-alpha
MOL005100	5,7-dihydroxy-2-(3-hydroxy-4-methoxyphenyl)chroman-4-one	Calmodulin
MOL005100	5,7-dihydroxy-2-(3-hydroxy-4-methoxyphenyl)chroman-4-one	Sodium channel protein type 5 subunit alpha
MOL005100	5,7-dihydroxy-2-(3-hydroxy-4-methoxyphenyl)chroman-4-one	Phosphatidylinositol-4,5-bisphosphate 3-kinase catalytic subunit, gamma isoform
MOL005100	5,7-dihydroxy-2-(3-hydroxy-4-methoxyphenyl)chroman-4-one	Nuclear receptor coactivator 2
MOL005100	5,7-dihydroxy-2-(3-hydroxy-4-methoxyphenyl)chroman-4-one	Nuclear receptor coactivator 1
MOL005100	5,7-dihydroxy-2-(3-hydroxy-4-methoxyphenyl)chroman-4-one	DNA topoisomerase II
MOL005815	Citromitin	Potassium voltage-gated channel subfamily H member 2
MOL005815	Citromitin	Sodium channel protein type 5 subunit alpha
MOL005815	Citromitin	Coagulation factor Xa
MOL005815	Citromitin	Prostaglandin G/H synthase 2
MOL005815	Citromitin	Coagulation factor VII
MOL005815	Citromitin	DNA topoisomerase II
MOL005815	Citromitin	Heat shock protein HSP 90
MOL005815	Citromitin	Nuclear receptor coactivator 2
MOL005815	Citromitin	Calcium-activated potassium channel subunit alpha 1
MOL005815	Citromitin	Calmodulin
MOL005828	nobiletin	Nitric oxide synthase, inducible
MOL005828	nobiletin	Prostaglandin G/H synthase 1
MOL005828	nobiletin	Thrombin
MOL005828	nobiletin	Potassium voltage-gated channel subfamily H member 2
MOL005828	nobiletin	Estrogen receptor
MOL005828	nobiletin	Androgen receptor
MOL005828	nobiletin	Peroxisome proliferator activated receptor gamma
MOL005828	nobiletin	Coagulation factor Xa
MOL005828	nobiletin	Prostaglandin G/H synthase 2
MOL005828	nobiletin	Coagulation factor VII
MOL005828	nobiletin	mRNA of Protein-tyrosine phosphatase, non-receptor type 1
MOL005828	nobiletin	DNA topoisomerase II
MOL005828	nobiletin	Estrogen receptor beta
MOL005828	nobiletin	Dipeptidyl peptidase IV
MOL005828	nobiletin	Heat shock protein HSP 90
MOL005828	nobiletin	Serine/threonine-protein kinase Chk1
MOL005828	nobiletin	Trypsin-1
MOL005828	nobiletin	Nuclear receptor coactivator 2
MOL005828	nobiletin	Calcium-activated potassium channel subunit alpha 1
MOL005828	nobiletin	Calmodulin
MOL005828	nobiletin	Glycogen synthase kinase-3 beta
MOL005828	nobiletin	Sodium channel protein type 5 subunit alpha
MOL005828	nobiletin	Apoptosis regulator Bcl-2
MOL005828	nobiletin	Apoptosis regulator BAX
MOL005828	nobiletin	Caspase-9
MOL005828	nobiletin	Matrix metalloproteinase-9
MOL005828	nobiletin	Transcription factor AP-1
MOL005828	nobiletin	Cellular tumor antigen p53
MOL005828	nobiletin	Mitogen-activated protein kinase 8
MOL005828	nobiletin	Metalloproteinase inhibitor 1
MOL005828	nobiletin	Peroxisome proliferator-activated receptor gamma
MOL005828	nobiletin	Cyclic AMP-responsive element-binding protein 1
MOL005828	nobiletin	Cytosolic phospholipase A2
MOL005828	nobiletin	Scavenger receptor cysteine-rich type 1 protein M130
MOL005828	nobiletin	Ephrin type-B receptor 2
Poria Cocos (Schw.) Wolf	PCW		Mol ID	Molecule Name	MW	OB%	DL
MOL000273	(2R)-2-[(3S,5R,10S,13R,14R,16R,17R)-3,16-dihydroxy-4,4,10,13,14-pentamethyl-2,3,5,6,12,15,16,17-octahydro-1H-cyclopenta[a]phenanthren-17-yl]-6-methylhept-5-enoic acid	Mineralocorticoid receptor	MOL000273	(2R)-2-[(3S,5R,10S,13R,14R,16R,17R)-3,16-dihydroxy-4,4,10,13,14-pentamethyl-2,3,5,6,12,15,16,17-octahydro-1H-cyclopenta[a]phenanthren-17-yl]-6-methylhept-5-enoic acid	470.76	30.93	0.81
MOL000273	(2R)-2-[(3S,5R,10S,13R,14R,16R,17R)-3,16-dihydroxy-4,4,10,13,14-pentamethyl-2,3,5,6,12,15,16,17-octahydro-1H-cyclopenta[a]phenanthren-17-yl]-6-methylhept-5-enoic acid	Nuclear receptor coactivator 2	MOL000275	trametenolic acid	456.78	38.71	0.8
MOL000275	trametenolic acid	Mineralocorticoid receptor	MOL000276	7,9(11)-dehydropachymic acid	526.83	35.11	0.81
MOL000279	Cerevisterol	Mineralocorticoid receptor	MOL000279	Cerevisterol	430.74	37.96	0.77
MOL000282	ergosta-7,22E-dien-3beta-ol	Progesterone receptor	MOL000280	(2R)-2-[(3S,5R,10S,13R,14R,16R,17R)-3,16-dihydroxy-4,4,10,13,14-pentamethyl-2,3,5,6,12,15,16,17-octahydro-1H-cyclopenta[a]phenanthren-17-yl]-5-isopropyl-hex-5-enoic acid	484.79	31.07	0.82
MOL000283	Ergosterol peroxide	Progesterone receptor	MOL000282	ergosta-7,22E-dien-3beta-ol	398.74	43.51	0.72
MOL000296	hederagenin	Progesterone receptor	MOL000283	Ergosterol peroxide	430.74	40.36	0.81
MOL000296	hederagenin	Nuclear receptor coactivator 2	MOL000285	(2R)-2-[(5R,10S,13R,14R,16R,17R)-16-hydroxy-3-keto-4,4,10,13,14-pentamethyl-1,2,5,6,12,15,16,17-octahydrocyclopenta[a]phenanthren-17-yl]-5-isopropyl-hex-5-enoic acid	482.77	38.26	0.82
MOL000296	hederagenin	Muscarinic acetylcholine receptor M3	MOL000287	3beta-Hydroxy-24-methylene-8-lanostene-21-oic acid	470.81	38.7	0.81
MOL000296	hederagenin	Muscarinic acetylcholine receptor M1	MOL000289	pachymic acid	528.85	33.63	0.81
MOL000296	hederagenin	Gamma-aminobutyric-acid receptor alpha-2 subunit	MOL000290	Poricoic acid A	498.77	30.61	0.76
MOL000296	hederagenin	Gamma-aminobutyric-acid receptor alpha-3 subunit	MOL000291	Poricoic acid B	484.74	30.52	0.75
MOL000296	hederagenin	Muscarinic acetylcholine receptor M2	MOL000292	poricoic acid C	482.77	38.15	0.75
MOL000296	hederagenin	Alpha-1B adrenergic receptor	MOL000296	hederagenin	414.79	36.91	0.75
MOL000296	hederagenin	Gamma-aminobutyric acid receptor subunit alpha-1	MOL000300	dehydroeburicoic acid	453.75	44.17	0.83
MOL000296	hederagenin	Glutamate receptor 2
MOL000296	hederagenin	Gamma-aminobutyric-acid receptor subunit alpha-6
MOL000296	hederagenin	Gamma-aminobutyric-acid receptor alpha-5 subunit
MOL000296	hederagenin	Ig gamma-1 chain C region
MOL000296	hederagenin	Alcohol dehydrogenase 1B
MOL000296	hederagenin	Alcohol dehydrogenase 1C
MOL000296	hederagenin	Lysozyme
MOL000296	hederagenin	Nicotinate-nucleotide--dimethylbenzimidazole phosphoribosyltransferase
MOL000296	hederagenin	Prostaglandin G/H synthase 1
MOL000296	hederagenin	Sodium channel protein type 5 subunit alpha
MOL000296	hederagenin	Prostaglandin G/H synthase 2
MOL000296	hederagenin	Retinoic acid receptor RXR-alpha
MOL000296	hederagenin	CGMP-inhibited 3',5'-cyclic phosphodiesterase A
MOL000296	hederagenin	Sodium-dependent noradrenaline transporter
MOL000296	hederagenin	Cytochrome P450-cam
Aconitum carmichaelii debx	ACD		Mol ID	Molecule Name	MW	OB%	DL
MOL002211	11,14-eicosadienoic acid	Nuclear receptor coactivator 2	MOL002211	11,14-eicosadienoic acid	308.56	39.99	0.2
MOL002384	14-Deoxy-11,12-didehydroandrographolide	Prostaglandin G/H synthase 2	MOL002388	Delphin_qt	303.26	57.76	0.28
MOL002384	14-Deoxy-11,12-didehydroandrographolide	Progesterone receptor	MOL002392	Deltoin	328.39	46.69	0.37
MOL002384	14-Deoxy-11,12-didehydroandrographolide	Nuclear receptor coactivator 1	MOL002393	Demethyldelavaine A	700.91	34.52	0.18
MOL002388	Delphin_qt	Prostaglandin G/H synthase 1	MOL002394	Demethyldelavaine B	700.91	34.52	0.18
MOL002388	Delphin_qt	Prostaglandin G/H synthase 2	MOL002395	Deoxyandrographolide	334.5	56.3	0.31
MOL002388	Delphin_qt	Carbonic anhydrase II	MOL002397	karakoline	377.58	51.73	0.73
MOL002388	Delphin_qt	Heat shock protein HSP 90	MOL002398	Karanjin	292.3	69.56	0.34
MOL002388	Delphin_qt	Phosphatidylinositol-4,5-bisphosphate 3-kinase catalytic subunit, gamma isoform	MOL002401	Neokadsuranic acid B	452.74	43.1	0.85
MOL002388	Delphin_qt	Nuclear receptor coactivator 2	MOL002406	2,7-Dideacetyl-2,7-dibenzoyl-taxayunnanine F	776.9	39.43	0.38
MOL002392	Deltoin	Prostaglandin G/H synthase 1	MOL002410	benzoylnapelline	463.67	34.06	0.53
MOL002392	Deltoin	Thrombin	MOL002415	6-Demethyldesoline	453.64	51.87	0.66
MOL002392	Deltoin	Sodium channel protein type 5 subunit alpha	MOL002416	deoxyaconitine	629.82	30.96	0.24
MOL002392	Deltoin	Coagulation factor Xa	MOL002419	(R)-Norcoclaurine	271.34	82.54	0.21
MOL002392	Deltoin	Prostaglandin G/H synthase 2	MOL002421	ignavine	449.59	84.08	0.25
MOL002392	Deltoin	Acetylcholinesterase	MOL002422	isotalatizidine	407.61	50.82	0.73
MOL002392	Deltoin	Alpha-1B adrenergic receptor	MOL002423	jesaconitine	675.85	33.41	0.19
MOL002392	Deltoin	Beta-2 adrenergic receptor	MOL002433	(3R,8S,9R,10R,13R,14S,17R)-3-hydroxy-4,4,9,13,14-pentamethyl-17-[(E,2R)-6-methyl-7-[(2R,3R,4S,5S,6R)-3,4,5-trihydroxy-6-[[(2R,3R,4S,5S,6R)-3,4,5-trihydroxy-6-(hydroxymethyl)oxan-2-yl]oxymethyl]oxan-2-yl]oxyhept-5-en-2-yl]-1,2,3,7,8,10,12,15,16,17-decahydr	781.1	41.52	0.22
MOL002392	Deltoin	Dipeptidyl peptidase IV	MOL002434	Carnosifloside I_qt	456.78	38.16	0.8
MOL002392	Deltoin	Trypsin-1	MOL000359	sitosterol	414.79	36.91	0.75
MOL002392	Deltoin	Calmodulin	MOL000538	hypaconitine	615.79	31.39	0.26
MOL002395	Deoxyandrographolide	Prostaglandin G/H synthase 2
MOL002395	Deoxyandrographolide	Progesterone receptor
MOL002395	Deoxyandrographolide	Nuclear receptor coactivator 2
MOL002395	Deoxyandrographolide	Nuclear receptor coactivator 1
MOL002398	Karanjin	Prostaglandin G/H synthase 1
MOL002398	Karanjin	Estrogen receptor
MOL002398	Karanjin	Prostaglandin G/H synthase 2
MOL002398	Karanjin	Phosphatidylinositol-4,5-bisphosphate 3-kinase catalytic subunit, gamma isoform
MOL002398	Karanjin	Serine/threonine-protein kinase Chk1
MOL002399	TMPEA	Muscarinic acetylcholine receptor M3
MOL002399	TMPEA	Muscarinic acetylcholine receptor M1
MOL002399	TMPEA	Beta-1 adrenergic receptor
MOL002399	TMPEA	Prostaglandin G/H synthase 2
MOL002399	TMPEA	Alpha-2A adrenergic receptor
MOL002399	TMPEA	5-hydroxytryptamine 1A receptor
MOL002399	TMPEA	Alpha-2C adrenergic receptor
MOL002399	TMPEA	CGMP-inhibited 3',5'-cyclic phosphodiesterase A
MOL002399	TMPEA	5-hydroxytryptamine 2A receptor
MOL002399	TMPEA	Sodium-dependent noradrenaline transporter
MOL002399	TMPEA	Alpha-1A adrenergic receptor
MOL002399	TMPEA	Alpha-2B adrenergic receptor
MOL002399	TMPEA	Alpha-1B adrenergic receptor
MOL002399	TMPEA	Sodium-dependent dopamine transporter
MOL002399	TMPEA	Beta-2 adrenergic receptor
MOL002399	TMPEA	Sodium-dependent serotonin transporter
MOL002399	TMPEA	Gamma-aminobutyric acid receptor subunit alpha-1
MOL002399	TMPEA	Leukotriene A-4 hydrolase
MOL002405	Tamarixinol	Thrombin
MOL002405	Tamarixinol	Sodium channel protein type 5 subunit alpha
MOL002417	fuzitine	Prostaglandin G/H synthase 1
MOL002417	fuzitine	Muscarinic acetylcholine receptor M3
MOL002417	fuzitine	Muscarinic acetylcholine receptor M1
MOL002417	fuzitine	Androgen receptor
MOL002417	fuzitine	Prostaglandin G/H synthase 2
MOL002417	fuzitine	Retinoic acid receptor RXR-alpha
MOL002417	fuzitine	Acetylcholinesterase
MOL002417	fuzitine	Beta-2 adrenergic receptor
MOL002417	fuzitine	DNA topoisomerase II
MOL002417	fuzitine	Pregnane X receptor
MOL002417	fuzitine	Heat shock protein HSP 90
MOL002417	fuzitine	Calcium-activated potassium channel subunit alpha 1
MOL002425	Zoba EG	Alcohol dehydrogenase 1C
MOL002425	Zoba EG	Lysozyme
MOL002425	Zoba EG	Nicotinate-nucleotide--dimethylbenzimidazole phosphoribosyltransferase
MOL002427	Zoba 3GA	Alcohol dehydrogenase 1C
MOL002427	Zoba 3GA	Lysozyme
MOL002427	Zoba 3GA	Nicotinate-nucleotide--dimethylbenzimidazole phosphoribosyltransferase
MOL002428	UNAL	Alcohol dehydrogenase 1C
MOL002428	UNAL	Lysozyme
MOL002428	UNAL	Nicotinate-nucleotide--dimethylbenzimidazole phosphoribosyltransferase
MOL002430	Salsolinol	Prostaglandin G/H synthase 1
MOL002430	Salsolinol	Dopamine D1 receptor
MOL002430	Salsolinol	Muscarinic acetylcholine receptor M3
MOL002430	Salsolinol	Muscarinic acetylcholine receptor M1
MOL002430	Salsolinol	Beta-1 adrenergic receptor
MOL002430	Salsolinol	Prostaglandin G/H synthase 2
MOL002430	Salsolinol	Alpha-2A adrenergic receptor
MOL002430	Salsolinol	Alpha-2C adrenergic receptor
MOL002430	Salsolinol	Sodium-dependent noradrenaline transporter
MOL002430	Salsolinol	Alpha-1A adrenergic receptor
MOL002430	Salsolinol	Alpha-2B adrenergic receptor
MOL002430	Salsolinol	Alpha-1B adrenergic receptor
MOL002430	Salsolinol	Sodium-dependent dopamine transporter
MOL002430	Salsolinol	Beta-2 adrenergic receptor
MOL002430	Salsolinol	Alpha-1D adrenergic receptor
MOL002430	Salsolinol	Leukotriene A-4 hydrolase
MOL002430	Salsolinol	Amine oxidase [flavin-containing] B
MOL002430	Salsolinol	Queuine tRNA-ribosyltransferase
MOL000359	sitosterol	Progesterone receptor
MOL000359	sitosterol	Nuclear receptor coactivator 2
MOL000359	sitosterol	Mineralocorticoid receptor
Glycyrrhiza uralensis Fisch	GF		Mol ID	Molecule Name	MW	OB%	DL
MOL000098	quercetin	Prostaglandin G/H synthase 1	MOL000098	quercetin	302.25	46.43	0.28
MOL000098	quercetin	Androgen receptor	MOL000211	Mairin	456.78	55.38	0.78
MOL000098	quercetin	Peroxisome proliferator activated receptor gamma	MOL000239	Jaranol	314.31	50.83	0.29
MOL000098	quercetin	Prostaglandin G/H synthase 2	MOL000354	isorhamnetin	316.28	49.6	0.31
MOL000098	quercetin	Heat shock protein HSP 90	MOL000359	sitosterol	414.79	36.91	0.75
MOL000098	quercetin	Phosphatidylinositol-4,5-bisphosphate 3-kinase catalytic subunit, gamma isoform	MOL000392	formononetin	268.28	69.67	0.21
MOL000098	quercetin	Nuclear receptor coactivator 2	MOL000417	Calycosin	284.28	47.75	0.24
MOL000098	quercetin	Dipeptidyl peptidase IV	MOL000422	kaempferol	286.25	41.88	0.24
MOL000098	quercetin	Aldose reductase	MOL000497	licochalcone a	338.43	40.79	0.29
MOL000098	quercetin	Trypsin-1	MOL000500	Vestitol	272.32	74.66	0.21
MOL000098	quercetin	DNA topoisomerase II	MOL001484	Inermine	284.28	75.18	0.54
MOL000098	quercetin	Thrombin	MOL001792	DFV	256.27	32.76	0.18
MOL000098	quercetin	Potassium voltage-gated channel subfamily H member 2	MOL002311	Glycyrol	366.39	90.78	0.67
MOL000098	quercetin	Sodium channel protein type 5 subunit alpha	MOL002565	Medicarpin	270.3	49.22	0.34
MOL000098	quercetin	Coagulation factor Xa	MOL003656	Lupiwighteone	338.38	51.64	0.37
MOL000098	quercetin	Beta-2 adrenergic receptor	MOL003896	7-Methoxy-2-methyl isoflavone	266.31	42.56	0.2
MOL000098	quercetin	Stromelysin-1	MOL004328	naringenin	272.27	59.29	0.21
MOL000098	quercetin	mRNA of PKA Catalytic Subunit C-alpha	MOL004805	(2S)-2-[4-hydroxy-3-(3-methylbut-2-enyl)phenyl]-8,8-dimethyl-2,3-dihydropyrano[2,3-f]chromen-4-one	390.51	31.79	0.72
MOL000098	quercetin	Coagulation factor VII	MOL004806	euchrenone	406.56	30.29	0.57
MOL000098	quercetin	Nitric-oxide synthase, endothelial	MOL004808	glyasperin B	370.43	65.22	0.44
MOL000098	quercetin	Retinoic acid receptor RXR-alpha	MOL004810	glyasperin F	354.38	75.84	0.54
MOL000098	quercetin	Acetylcholinesterase	MOL004811	Glyasperin C	356.45	45.56	0.4
MOL000098	quercetin	Gamma-aminobutyric acid receptor subunit alpha-1	MOL004814	Isotrifoliol	298.26	31.94	0.42
MOL000098	quercetin	Amine oxidase [flavin-containing] B	MOL004815	(E)-1-(2,4-dihydroxyphenyl)-3-(2,2-dimethylchromen-6-yl)prop-2-en-1-one	322.38	39.62	0.35
MOL000098	quercetin	Transcription factor p65	MOL004820	kanzonols W	336.36	50.48	0.52
MOL000098	quercetin	Epidermal growth factor receptor	MOL004824	(2S)-6-(2,4-dihydroxyphenyl)-2-(2-hydroxypropan-2-yl)-4-methoxy-2,3-dihydrofuro[3,2-g]chromen-7-one	384.41	60.25	0.63
MOL000098	quercetin	RAC-alpha serine/threonine-protein kinase	MOL004827	Semilicoisoflavone B	352.36	48.78	0.55
MOL000098	quercetin	Vascular endothelial growth factor A	MOL004828	Glepidotin A	338.38	44.72	0.35
MOL000098	quercetin	G1/S-specific cyclin-D1	MOL004829	Glepidotin B	340.4	64.46	0.34
MOL000098	quercetin	Apoptosis regulator Bcl-2	MOL004833	Phaseolinisoflavan	324.4	32.01	0.45
MOL000098	quercetin	Bcl-2-like protein 1	MOL004835	Glypallichalcone	284.33	61.6	0.19
MOL000098	quercetin	Proto-oncogene c-Fos	MOL004838	8-(6-hydroxy-2-benzofuranyl)-2,2-dimethyl-5-chromenol	308.35	58.44	0.38
MOL000098	quercetin	Cyclin-dependent kinase inhibitor 1	MOL004841	Licochalcone B	286.3	76.76	0.19
MOL000098	quercetin	Eukaryotic translation initiation factor 6	MOL004848	licochalcone G	354.43	49.25	0.32
MOL000098	quercetin	Apoptosis regulator BAX	MOL004849	3-(2,4-dihydroxyphenyl)-8-(1,1-dimethylprop-2-enyl)-7-hydroxy-5-methoxy-coumarin	368.41	59.62	0.43
MOL000098	quercetin	Caspase-9	MOL004855	Licoricone	382.44	63.58	0.47
MOL000098	quercetin	Urokinase-type plasminogen activator	MOL004856	Gancaonin A	352.41	51.08	0.4
MOL000098	quercetin	72 kDa type IV collagenase	MOL004857	Gancaonin B	368.41	48.79	0.45
MOL000098	quercetin	Matrix metalloproteinase-9	MOL004860	licorice glycoside E	693.71	32.89	0.27
MOL000098	quercetin	Mitogen-activated protein kinase 1	MOL004863	3-(3,4-dihydroxyphenyl)-5,7-dihydroxy-8-(3-methylbut-2-enyl)chromone	354.38	66.37	0.41
MOL000098	quercetin	Interleukin-10	MOL004864	5,7-dihydroxy-3-(4-methoxyphenyl)-8-(3-methylbut-2-enyl)chromone	352.41	30.49	0.41
MOL000098	quercetin	Pro-epidermal growth factor	MOL004866	2-(3,4-dihydroxyphenyl)-5,7-dihydroxy-6-(3-methylbut-2-enyl)chromone	354.38	44.15	0.41
MOL000098	quercetin	Retinoblastoma-associated protein	MOL004879	Glycyrin	382.44	52.61	0.47
MOL000098	quercetin	Tumor necrosis factor	MOL004882	Licocoumarone	340.4	33.21	0.36
MOL000098	quercetin	Transcription factor AP-1	MOL004883	Licoisoflavone	354.38	41.61	0.42
MOL000098	quercetin	Interleukin-6	MOL004884	Licoisoflavone B	352.36	38.93	0.55
MOL000098	quercetin	Cyclin-dependent kinase inhibitor 2A, isoforms 1/2/3	MOL004885	licoisoflavanone	354.38	52.47	0.54
MOL000098	quercetin	Activator of 90 kDa heat shock protein ATPase homolog 1	MOL004891	shinpterocarpin	322.38	80.3	0.73
MOL000098	quercetin	Caspase-3	MOL004898	(E)-3-[3,4-dihydroxy-5-(3-methylbut-2-enyl)phenyl]-1-(2,4-dihydroxyphenyl)prop-2-en-1-one	340.4	46.27	0.31
MOL000098	quercetin	Cellular tumor antigen p53	MOL004903	liquiritin	418.43	65.69	0.74
MOL000098	quercetin	ETS domain-containing protein Elk-1	MOL004904	licopyranocoumarin	384.41	80.36	0.65
MOL000098	quercetin	NF-kappa-B inhibitor alpha	MOL004905	3,22-Dihydroxy-11-oxo-delta(12)-oleanene-27-alpha-methoxycarbonyl-29-oic acid	512.75	34.32	0.55
MOL000098	quercetin	NADPH--cytochrome P450 reductase	MOL004907	Glyzaglabrin	298.26	61.07	0.35
MOL000098	quercetin	Ornithine decarboxylase	MOL004908	Glabridin	324.4	53.25	0.47
MOL000098	quercetin	Xanthine dehydrogenase/oxidase	MOL004910	Glabranin	324.4	52.9	0.31
MOL000098	quercetin	Caspase-8	MOL004911	Glabrene	322.38	46.27	0.44
MOL000098	quercetin	DNA topoisomerase 1	MOL004912	Glabrone	336.36	52.51	0.5
MOL000098	quercetin	RAF proto-oncogene serine/threonine-protein kinase	MOL004913	1,3-dihydroxy-9-methoxy-6-benzofurano[3,2-c]chromenone	298.26	48.14	0.43
MOL000098	quercetin	Superoxide dismutase [Cu-Zn]	MOL004914	1,3-dihydroxy-8,9-dimethoxy-6-benzofurano[3,2-c]chromenone	328.29	62.9	0.53
MOL000098	quercetin	Protein kinase C alpha type	MOL004915	Eurycarpin A	338.38	43.28	0.37
MOL000098	quercetin	Interstitial collagenase	MOL004917	glycyroside	562.57	37.25	0.79
MOL000098	quercetin	Hypoxia-inducible factor 1-alpha	MOL004924	(-)-Medicocarpin	432.46	40.99	0.95
MOL000098	quercetin	Signal transducer and activator of transcription 1-alpha/beta	MOL004935	Sigmoidin-B	356.4	34.88	0.41
MOL000098	quercetin	Protein CBFA2T1	MOL004941	(2R)-7-hydroxy-2-(4-hydroxyphenyl)chroman-4-one	256.27	71.12	0.18
MOL000098	quercetin	Probable E3 ubiquitin-protein ligase HERC5	MOL004945	(2S)-7-hydroxy-2-(4-hydroxyphenyl)-8-(3-methylbut-2-enyl)chroman-4-one	324.4	36.57	0.32
MOL000098	quercetin	Cell division control protein 2 homolog	MOL004948	Isoglycyrol	366.39	44.7	0.84
MOL000098	quercetin	78 kDa glucose-regulated protein	MOL004949	Isolicoflavonol	354.38	45.17	0.42
MOL000098	quercetin	Receptor tyrosine-protein kinase erbB-2	MOL004957	HMO	268.28	38.37	0.21
MOL000098	quercetin	Peroxisome proliferator-activated receptor gamma	MOL004959	1-Methoxyphaseollidin	354.43	69.98	0.64
MOL000098	quercetin	Acetyl-CoA carboxylase 1	MOL004961	Quercetin der.	330.31	46.45	0.33
MOL000098	quercetin	Heme oxygenase 1	MOL004966	3'-Hydroxy-4'-O-Methylglabridin	354.43	43.71	0.57
MOL000098	quercetin	Cytochrome P450 3A4	MOL004974	3'-Methoxyglabridin	354.43	46.16	0.57
MOL000098	quercetin	Cytochrome P450 1A2	MOL004978	2-[(3R)-8,8-dimethyl-3,4-dihydro-2H-pyrano[6,5-f]chromen-3-yl]-5-methoxyphenol	338.43	36.21	0.52
MOL000098	quercetin	Caveolin-1	MOL004980	Inflacoumarin A	322.38	39.71	0.33
MOL000098	quercetin	Myc proto-oncogene protein	MOL004985	icos-5-enoic acid	310.58	30.7	0.2
MOL000098	quercetin	Tissue factor	MOL004988	Kanzonol F	420.54	32.47	0.89
MOL000098	quercetin	Gap junction alpha-1 protein	MOL004989	6-prenylated eriodictyol	356.4	39.22	0.41
MOL000098	quercetin	Cytochrome P450 1A1	MOL004990	7,2',4'-trihydroxy－5-methoxy-3－arylcoumarin	300.28	83.71	0.27
MOL000098	quercetin	Intercellular adhesion molecule 1	MOL004991	7-Acetoxy-2-methylisoflavone	294.32	38.92	0.26
MOL000098	quercetin	Interleukin-1 beta	MOL004993	8-prenylated eriodictyol	356.4	53.79	0.4
MOL000098	quercetin	C-C motif chemokine 2	MOL004996	gadelaidic acid	310.58	30.7	0.2
MOL000098	quercetin	E-selectin	MOL005000	Gancaonin G	352.41	60.44	0.39
MOL000098	quercetin	Vascular cell adhesion protein 1	MOL005001	Gancaonin H	420.49	50.1	0.78
MOL000098	quercetin	Prostaglandin E2 receptor EP3 subtype	MOL005003	Licoagrocarpin	338.43	58.81	0.58
MOL000098	quercetin	Interleukin-8	MOL005007	Glyasperins M	368.41	72.67	0.59
MOL000098	quercetin	Protein kinase C beta type	MOL005008	Glycyrrhiza flavonol A	370.38	41.28	0.6
MOL000098	quercetin	Baculoviral IAP repeat-containing protein 5	MOL005012	Licoagroisoflavone	336.36	57.28	0.49
MOL000098	quercetin	Dual oxidase 2	MOL005013	18α-hydroxyglycyrrhetic acid	486.76	41.16	0.71
MOL000098	quercetin	Nitric oxide synthase, endothelial	MOL005016	Odoratin	314.31	49.95	0.3
MOL000098	quercetin	Heat shock protein beta-1	MOL005017	Phaseol	336.36	78.77	0.58
MOL000098	quercetin	Transforming growth factor beta-1	MOL005018	Xambioona	388.49	54.85	0.87
MOL000098	quercetin	Estrogen sulfotransferase	MOL005020	dehydroglyasperins C	340.4	53.82	0.37
MOL000098	quercetin	Maltase-glucoamylase, intestinal
MOL000098	quercetin	Interleukin-2
MOL000098	quercetin	Nuclear receptor subfamily 1 group I member 2
MOL000098	quercetin	Cytochrome P450 1B1
MOL000098	quercetin	G2/mitotic-specific cyclin-B1
MOL000098	quercetin	Tissue-type plasminogen activator
MOL000098	quercetin	Thrombomodulin
MOL000098	quercetin	Plasminogen activator inhibitor 1
MOL000098	quercetin	Collagen alpha-1(I) chain
MOL000098	quercetin	Interferon gamma
MOL000098	quercetin	Arachidonate 5-lipoxygenase
MOL000098	quercetin	Phosphatidylinositol-3,4,5-trisphosphate 3-phosphatase and dual-specificity protein phosphatase PTEN
MOL000098	quercetin	Interleukin-1 alpha
MOL000098	quercetin	Myeloperoxidase
MOL000098	quercetin	DNA topoisomerase 2-alpha
MOL000098	quercetin	Neutrophil cytosol factor 1
MOL000098	quercetin	ATP-binding cassette sub-family G member 2
MOL000098	quercetin	Hyaluronan synthase 2
MOL000098	quercetin	Glutathione S-transferase P
MOL000098	quercetin	Nuclear factor erythroid 2-related factor 2
MOL000098	quercetin	NAD(P)H dehydrogenase [quinone] 1
MOL000098	quercetin	Poly [ADP-ribose] polymerase 1
MOL000098	quercetin	Aryl hydrocarbon receptor
MOL000098	quercetin	26S proteasome non-ATPase regulatory subunit 3
MOL000098	quercetin	Solute carrier family 2, facilitated glucose transporter member 4
MOL000098	quercetin	Collagen alpha-1(III) chain
MOL000098	quercetin	DNA gyrase subunit B
MOL000098	quercetin	C-X-C motif chemokine 11
MOL000098	quercetin	C-X-C motif chemokine 2
MOL000098	quercetin	DDB1- and CUL4-associated factor 5
MOL000098	quercetin	Nuclear receptor subfamily 1 group I member 3
MOL000098	quercetin	Serine/threonine-protein kinase Chk2
MOL000098	quercetin	Insulin receptor
MOL000098	quercetin	Claudin-4
MOL000098	quercetin	Peroxisome proliferator-activated receptor alpha
MOL000098	quercetin	Peroxisome proliferator-activated receptor delta
MOL000098	quercetin	Heat shock factor protein 1
MOL000098	quercetin	C-reactive protein
MOL000098	quercetin	C-X-C motif chemokine 10
MOL000098	quercetin	Inhibitor of nuclear factor kappa-B kinase subunit alpha
MOL000098	quercetin	Osteopontin
MOL000098	quercetin	Runt-related transcription factor 2
MOL000098	quercetin	Ras association domain-containing protein 1
MOL000098	quercetin	Transcription factor E2F1
MOL000098	quercetin	Transcription factor E2F2
MOL000098	quercetin	Prostatic acid phosphatase
MOL000098	quercetin	Cathepsin D
MOL000098	quercetin	Insulin-like growth factor-binding protein 3
MOL000098	quercetin	Insulin-like growth factor II
MOL000098	quercetin	CD40 ligand
MOL000098	quercetin	Interferon regulatory factor 1
MOL000098	quercetin	Receptor tyrosine-protein kinase erbB-3
MOL000098	quercetin	Serum paraoxonase/arylesterase 1
MOL000098	quercetin	Type I iodothyronine deiodinase
MOL000098	quercetin	Procollagen C-endopeptidase enhancer 1
MOL000098	quercetin	Puromycin-sensitive aminopeptidase
MOL000098	quercetin	Hexokinase-2
MOL000098	quercetin	Homeobox protein Nkx-3.1
MOL000098	quercetin	Ras GTPase-activating protein 1
MOL000098	quercetin	Peroxidase C1A
MOL000098	quercetin	Glutathione S-transferase Mu 1
MOL000098	quercetin	Glutathione S-transferase Mu 2
MOL000211	Mairin	Progesterone receptor
MOL000239	Jaranol	Nitric oxide synthase, inducible
MOL000239	Jaranol	Prostaglandin G/H synthase 1
MOL000239	Jaranol	Androgen receptor
MOL000239	Jaranol	Sodium channel protein type 5 subunit alpha
MOL000239	Jaranol	Prostaglandin G/H synthase 2
MOL000239	Jaranol	Estrogen receptor beta
MOL000239	Jaranol	Dipeptidyl peptidase IV
MOL000239	Jaranol	Heat shock protein HSP 90
MOL000239	Jaranol	Cell division protein kinase 2
MOL000239	Jaranol	Serine/threonine-protein kinase Chk1
MOL000239	Jaranol	Trypsin-1
MOL000239	Jaranol	Nuclear receptor coactivator 2
MOL000239	Jaranol	Calmodulin
MOL000354	isorhamnetin	Nitric oxide synthase, inducible
MOL000354	isorhamnetin	Prostaglandin G/H synthase 1
MOL000354	isorhamnetin	Estrogen receptor
MOL000354	isorhamnetin	Androgen receptor
MOL000354	isorhamnetin	Peroxisome proliferator activated receptor gamma
MOL000354	isorhamnetin	Prostaglandin G/H synthase 2
MOL000354	isorhamnetin	mRNA of Protein-tyrosine phosphatase, non-receptor type 1
MOL000354	isorhamnetin	Estrogen receptor beta
MOL000354	isorhamnetin	Dipeptidyl peptidase IV
MOL000354	isorhamnetin	Mitogen-activated protein kinase 14
MOL000354	isorhamnetin	Glycogen synthase kinase-3 beta
MOL000354	isorhamnetin	Heat shock protein HSP 90
MOL000354	isorhamnetin	Cell division protein kinase 2
MOL000354	isorhamnetin	Phosphatidylinositol-4,5-bisphosphate 3-kinase catalytic subunit, gamma isoform
MOL000354	isorhamnetin	mRNA of PKA Catalytic Subunit C-alpha
MOL000354	isorhamnetin	Trypsin-1
MOL000354	isorhamnetin	Proto-oncogene serine/threonine-protein kinase Pim-1
MOL000354	isorhamnetin	Cyclin-A2
MOL000354	isorhamnetin	Nuclear receptor coactivator 2
MOL000354	isorhamnetin	Calmodulin
MOL000354	isorhamnetin	Glycogen phosphorylase, muscle form
MOL000354	isorhamnetin	Peroxisome proliferator activated receptor delta
MOL000354	isorhamnetin	Serine/threonine-protein kinase Chk1
MOL000354	isorhamnetin	Aldose reductase
MOL000354	isorhamnetin	Nuclear receptor coactivator 1
MOL000354	isorhamnetin	Coagulation factor VII
MOL000354	isorhamnetin	Thrombin
MOL000354	isorhamnetin	Nitric-oxide synthase, endothelial
MOL000354	isorhamnetin	Acetylcholinesterase
MOL000354	isorhamnetin	Gamma-aminobutyric acid receptor subunit alpha-1
MOL000354	isorhamnetin	Amine oxidase [flavin-containing] B
MOL000354	isorhamnetin	Glutamate receptor 2
MOL000354	isorhamnetin	Cytochrome P450-cam
MOL000354	isorhamnetin	Transcription factor p65
MOL000354	isorhamnetin	Xanthine dehydrogenase/oxidase
MOL000354	isorhamnetin	Neutrophil cytosol factor 1
MOL000354	isorhamnetin	Oxidized low-density lipoprotein receptor 1
MOL000359	sitosterol	Progesterone receptor
MOL000359	sitosterol	Nuclear receptor coactivator 2
MOL000359	sitosterol	Mineralocorticoid receptor
MOL000392	formononetin	Nitric oxide synthase, inducible
MOL000392	formononetin	Prostaglandin G/H synthase 1
MOL000392	formononetin	Muscarinic acetylcholine receptor M1
MOL000392	formononetin	Estrogen receptor
MOL000392	formononetin	Androgen receptor
MOL000392	formononetin	Peroxisome proliferator activated receptor gamma
MOL000392	formononetin	Prostaglandin G/H synthase 2
MOL000392	formononetin	Retinoic acid receptor RXR-alpha
MOL000392	formononetin	CGMP-inhibited 3',5'-cyclic phosphodiesterase A
MOL000392	formononetin	Alpha-1A adrenergic receptor
MOL000392	formononetin	Sodium-dependent dopamine transporter
MOL000392	formononetin	Beta-2 adrenergic receptor
MOL000392	formononetin	Sodium-dependent serotonin transporter
MOL000392	formononetin	Estrogen receptor beta
MOL000392	formononetin	Dipeptidyl peptidase IV
MOL000392	formononetin	Mitogen-activated protein kinase 14
MOL000392	formononetin	Glycogen synthase kinase-3 beta
MOL000392	formononetin	Heat shock protein HSP 90
MOL000392	formononetin	Cell division protein kinase 2
MOL000392	formononetin	Amine oxidase [flavin-containing] B
MOL000392	formononetin	Serine/threonine-protein kinase Chk1
MOL000392	formononetin	mRNA of PKA Catalytic Subunit C-alpha
MOL000392	formononetin	Trypsin-1
MOL000392	formononetin	Proto-oncogene serine/threonine-protein kinase Pim-1
MOL000392	formononetin	Cyclin-A2
MOL000392	formononetin	Calmodulin
MOL000392	formononetin	cAMP-dependent protein kinase inhibitor alpha
MOL000392	formononetin	Thrombin
MOL000392	formononetin	Nitric-oxide synthase, endothelial
MOL000392	formononetin	Acetylcholinesterase
MOL000392	formononetin	Beta-lactamase
MOL000392	formononetin	Transcription factor AP-1
MOL000392	formononetin	Peroxisome proliferator-activated receptor gamma
MOL000392	formononetin	Interleukin-4
MOL000392	formononetin	NAD-dependent deacetylase sirtuin-1
MOL000392	formononetin	ATP synthase subunit beta, mitochondrial
MOL000392	formononetin	NADH-ubiquinone oxidoreductase chain 6
MOL000392	formononetin	3 beta-hydroxysteroid dehydrogenase/Delta 5-->4-isomerase type 2
MOL000392	formononetin	3 beta-hydroxysteroid dehydrogenase/Delta 5-->4-isomerase type 1
MOL000417	Calycosin	Nitric oxide synthase, inducible
MOL000417	Calycosin	Prostaglandin G/H synthase 1
MOL000417	Calycosin	Estrogen receptor
MOL000417	Calycosin	Androgen receptor
MOL000417	Calycosin	Peroxisome proliferator activated receptor gamma
MOL000417	Calycosin	Prostaglandin G/H synthase 2
MOL000417	Calycosin	Retinoic acid receptor RXR-alpha
MOL000417	Calycosin	CGMP-inhibited 3',5'-cyclic phosphodiesterase A
MOL000417	Calycosin	Estrogen receptor beta
MOL000417	Calycosin	Dipeptidyl peptidase IV
MOL000417	Calycosin	Mitogen-activated protein kinase 14
MOL000417	Calycosin	Glycogen synthase kinase-3 beta
MOL000417	Calycosin	Heat shock protein HSP 90
MOL000417	Calycosin	Cell division protein kinase 2
MOL000417	Calycosin	Serine/threonine-protein kinase Chk1
MOL000417	Calycosin	mRNA of PKA Catalytic Subunit C-alpha
MOL000417	Calycosin	Trypsin-1
MOL000417	Calycosin	Proto-oncogene serine/threonine-protein kinase Pim-1
MOL000417	Calycosin	Cyclin-A2
MOL000417	Calycosin	Nuclear receptor coactivator 2
MOL000417	Calycosin	Calmodulin
MOL000417	Calycosin	Beta-2 adrenergic receptor
MOL000422	kaempferol	Nitric oxide synthase, inducible
MOL000422	kaempferol	Prostaglandin G/H synthase 1
MOL000422	kaempferol	Androgen receptor
MOL000422	kaempferol	Peroxisome proliferator activated receptor gamma
MOL000422	kaempferol	Prostaglandin G/H synthase 2
MOL000422	kaempferol	Heat shock protein HSP 90
MOL000422	kaempferol	Phosphatidylinositol-4,5-bisphosphate 3-kinase catalytic subunit, gamma isoform
MOL000422	kaempferol	mRNA of PKA Catalytic Subunit C-alpha
MOL000422	kaempferol	Nuclear receptor coactivator 2
MOL000422	kaempferol	Dipeptidyl peptidase IV
MOL000422	kaempferol	Trypsin-1
MOL000422	kaempferol	Progesterone receptor
MOL000422	kaempferol	Thrombin
MOL000422	kaempferol	Muscarinic acetylcholine receptor M1
MOL000422	kaempferol	Nitric-oxide synthase, endothelial
MOL000422	kaempferol	Gamma-aminobutyric-acid receptor alpha-2 subunit
MOL000422	kaempferol	Acetylcholinesterase
MOL000422	kaempferol	Sodium-dependent noradrenaline transporter
MOL000422	kaempferol	Muscarinic acetylcholine receptor M2
MOL000422	kaempferol	Alpha-1B adrenergic receptor
MOL000422	kaempferol	Gamma-aminobutyric acid receptor subunit alpha-1
MOL000422	kaempferol	DNA topoisomerase II
MOL000422	kaempferol	Coagulation factor VII
MOL000422	kaempferol	Calmodulin
MOL000422	kaempferol	Transcription factor p65
MOL000422	kaempferol	Inhibitor of nuclear factor kappa-B kinase subunit beta
MOL000422	kaempferol	RAC-alpha serine/threonine-protein kinase
MOL000422	kaempferol	Apoptosis regulator Bcl-2
MOL000422	kaempferol	Apoptosis regulator BAX
MOL000422	kaempferol	Tumor necrosis factor
MOL000422	kaempferol	Transcription factor AP-1
MOL000422	kaempferol	Activator of 90 kDa heat shock protein ATPase homolog 1
MOL000422	kaempferol	Caspase-3
MOL000422	kaempferol	Mitogen-activated protein kinase 8
MOL000422	kaempferol	Xanthine dehydrogenase/oxidase
MOL000422	kaempferol	Interstitial collagenase
MOL000422	kaempferol	Signal transducer and activator of transcription 1-alpha/beta
MOL000422	kaempferol	Cell division control protein 2 homolog
MOL000422	kaempferol	Peroxisome proliferator-activated receptor gamma
MOL000422	kaempferol	Heme oxygenase 1
MOL000422	kaempferol	Cytochrome P450 3A4
MOL000422	kaempferol	Cytochrome P450 1A2
MOL000422	kaempferol	Cytochrome P450 1A1
MOL000422	kaempferol	Intercellular adhesion molecule 1
MOL000422	kaempferol	E-selectin
MOL000422	kaempferol	Vascular cell adhesion protein 1
MOL000422	kaempferol	Nuclear receptor subfamily 1 group I member 2
MOL000422	kaempferol	Cytochrome P450 1B1
MOL000422	kaempferol	Arachidonate 5-lipoxygenase
MOL000422	kaempferol	Hyaluronan synthase 2
MOL000422	kaempferol	Glutathione S-transferase P
MOL000422	kaempferol	Aryl hydrocarbon receptor
MOL000422	kaempferol	26S proteasome non-ATPase regulatory subunit 3
MOL000422	kaempferol	Solute carrier family 2, facilitated glucose transporter member 4
MOL000422	kaempferol	Nuclear receptor subfamily 1 group I member 3
MOL000422	kaempferol	Insulin receptor
MOL000422	kaempferol	Type I iodothyronine deiodinase
MOL000422	kaempferol	Serine/threonine-protein phosphatase 2B catalytic subunit alpha isoform
MOL000422	kaempferol	Peroxidase C1A
MOL000422	kaempferol	Glutathione S-transferase Mu 1
MOL000422	kaempferol	Glutathione S-transferase Mu 2
MOL000422	kaempferol	Aldo-keto reductase family 1 member C3
MOL000422	kaempferol	Antileukoproteinase
MOL000497	licochalcone a	Nitric oxide synthase, inducible
MOL000497	licochalcone a	Prostaglandin G/H synthase 1
MOL000497	licochalcone a	Muscarinic acetylcholine receptor M1
MOL000497	licochalcone a	Estrogen receptor
MOL000497	licochalcone a	Androgen receptor
MOL000497	licochalcone a	Sodium channel protein type 5 subunit alpha
MOL000497	licochalcone a	Peroxisome proliferator activated receptor gamma
MOL000497	licochalcone a	Coagulation factor Xa
MOL000497	licochalcone a	Prostaglandin G/H synthase 2
MOL000497	licochalcone a	Carbonic anhydrase II
MOL000497	licochalcone a	Alpha-1B adrenergic receptor
MOL000497	licochalcone a	Sodium-dependent dopamine transporter
MOL000497	licochalcone a	Estrogen receptor beta
MOL000497	licochalcone a	Mitogen-activated protein kinase 14
MOL000497	licochalcone a	Glycogen synthase kinase-3 beta
MOL000497	licochalcone a	Heat shock protein HSP 90
MOL000497	licochalcone a	Cell division protein kinase 2
MOL000497	licochalcone a	Serine/threonine-protein kinase Chk1
MOL000497	licochalcone a	Proto-oncogene serine/threonine-protein kinase Pim-1
MOL000497	licochalcone a	Cyclin-A2
MOL000497	licochalcone a	Calmodulin
MOL000497	licochalcone a	Beta-2 adrenergic receptor
MOL000497	licochalcone a	Nuclear receptor coactivator 2
MOL000497	licochalcone a	Transcription factor p65
MOL000497	licochalcone a	Signal transducer and activator of transcription 3
MOL000497	licochalcone a	G1/S-specific cyclin-D1
MOL000497	licochalcone a	Apoptosis regulator Bcl-2
MOL000497	licochalcone a	Eukaryotic translation initiation factor 6
MOL000497	licochalcone a	Mitogen-activated protein kinase 1
MOL000497	licochalcone a	Retinoblastoma-associated protein
MOL000497	licochalcone a	Cell division protein kinase 4
MOL000497	licochalcone a	Fos-related antigen 2
MOL000500	Vestitol	Nitric oxide synthase, inducible
MOL000500	Vestitol	Prostaglandin G/H synthase 1
MOL000500	Vestitol	Muscarinic acetylcholine receptor M1
MOL000500	Vestitol	Estrogen receptor
MOL000500	Vestitol	Androgen receptor
MOL000500	Vestitol	Sodium channel protein type 5 subunit alpha
MOL000500	Vestitol	Peroxisome proliferator activated receptor gamma
MOL000500	Vestitol	Prostaglandin G/H synthase 2
MOL000500	Vestitol	Muscarinic acetylcholine receptor M4
MOL000500	Vestitol	Retinoic acid receptor RXR-alpha
MOL000500	Vestitol	CGMP-inhibited 3',5'-cyclic phosphodiesterase A
MOL000500	Vestitol	5-hydroxytryptamine 2A receptor
MOL000500	Vestitol	Alpha-1A adrenergic receptor
MOL000500	Vestitol	Alpha-1B adrenergic receptor
MOL000500	Vestitol	Sodium-dependent dopamine transporter
MOL000500	Vestitol	Beta-2 adrenergic receptor
MOL000500	Vestitol	Sodium-dependent serotonin transporter
MOL000500	Vestitol	Estrogen receptor beta
MOL000500	Vestitol	Dipeptidyl peptidase IV
MOL000500	Vestitol	Mitogen-activated protein kinase 14
MOL000500	Vestitol	Glycogen synthase kinase-3 beta
MOL000500	Vestitol	Heat shock protein HSP 90
MOL000500	Vestitol	Cell division protein kinase 2
MOL000500	Vestitol	Serine/threonine-protein kinase Chk1
MOL000500	Vestitol	mRNA of PKA Catalytic Subunit C-alpha
MOL000500	Vestitol	Trypsin-1
MOL000500	Vestitol	Proto-oncogene serine/threonine-protein kinase Pim-1
MOL000500	Vestitol	Cyclin-A2
MOL000500	Vestitol	cAMP-dependent protein kinase inhibitor alpha
MOL000500	Vestitol	Calmodulin
MOL001484	Inermine	Prostaglandin G/H synthase 1
MOL001484	Inermine	Muscarinic acetylcholine receptor M3
MOL001484	Inermine	Sodium channel protein type 5 subunit alpha
MOL001484	Inermine	Prostaglandin G/H synthase 2
MOL001484	Inermine	5-hydroxytryptamine receptor 3A
MOL001484	Inermine	Retinoic acid receptor RXR-alpha
MOL001484	Inermine	Alpha-1B adrenergic receptor
MOL001484	Inermine	Alpha-1D adrenergic receptor
MOL001484	Inermine	Phosphatidylinositol-4,5-bisphosphate 3-kinase catalytic subunit, gamma isoform
MOL001484	Inermine	mRNA of PKA Catalytic Subunit C-alpha
MOL001484	Inermine	Ig gamma-1 chain C region
MOL001484	Inermine	Trypsin-1
MOL001484	Inermine	Calmodulin
MOL001484	Inermine	Muscarinic acetylcholine receptor M1
MOL001484	Inermine	Beta-2 adrenergic receptor
MOL001484	Inermine	Mu-type opioid receptor
MOL001484	Inermine	Heat shock protein HSP 90
MOL001792	DFV	Prostaglandin G/H synthase 1
MOL001792	DFV	Estrogen receptor
MOL001792	DFV	Prostaglandin G/H synthase 2
MOL001792	DFV	Retinoic acid receptor RXR-alpha
MOL001792	DFV	Beta-2 adrenergic receptor
MOL001792	DFV	Heat shock protein HSP 90
MOL001792	DFV	Phosphatidylinositol-4,5-bisphosphate 3-kinase catalytic subunit, gamma isoform
MOL001792	DFV	mRNA of PKA Catalytic Subunit C-alpha
MOL001792	DFV	Beta-lactamase
MOL001792	DFV	Amine oxidase [flavin-containing] B
MOL001792	DFV	Sodium-dependent serotonin transporter
MOL001792	DFV	cAMP-dependent protein kinase inhibitor alpha
MOL002311	Glycyrol	Nitric oxide synthase, inducible
MOL002311	Glycyrol	Estrogen receptor
MOL002311	Glycyrol	Peroxisome proliferator activated receptor gamma
MOL002311	Glycyrol	Prostaglandin G/H synthase 2
MOL002311	Glycyrol	Vascular endothelial growth factor receptor 2
MOL002311	Glycyrol	Mitogen-activated protein kinase 14
MOL002311	Glycyrol	Glycogen synthase kinase-3 beta
MOL002311	Glycyrol	Serine/threonine-protein kinase Chk1
MOL002311	Glycyrol	Proto-oncogene serine/threonine-protein kinase Pim-1
MOL002311	Glycyrol	Cyclin-A2
MOL002311	Glycyrol	Thrombin
MOL002565	Medicarpin	Nitric oxide synthase, inducible
MOL002565	Medicarpin	Prostaglandin G/H synthase 1
MOL002565	Medicarpin	Dopamine D1 receptor
MOL002565	Medicarpin	Muscarinic acetylcholine receptor M3
MOL002565	Medicarpin	Muscarinic acetylcholine receptor M1
MOL002565	Medicarpin	Estrogen receptor
MOL002565	Medicarpin	Sodium channel protein type 5 subunit alpha
MOL002565	Medicarpin	Muscarinic acetylcholine receptor M5
MOL002565	Medicarpin	Prostaglandin G/H synthase 2
MOL002565	Medicarpin	Muscarinic acetylcholine receptor M4
MOL002565	Medicarpin	Retinoic acid receptor RXR-alpha
MOL002565	Medicarpin	5-hydroxytryptamine 2A receptor
MOL002565	Medicarpin	Alpha-1A adrenergic receptor
MOL002565	Medicarpin	Muscarinic acetylcholine receptor M2
MOL002565	Medicarpin	Alpha-1B adrenergic receptor
MOL002565	Medicarpin	Sodium-dependent dopamine transporter
MOL002565	Medicarpin	Beta-2 adrenergic receptor
MOL002565	Medicarpin	Sodium-dependent serotonin transporter
MOL002565	Medicarpin	Mu-type opioid receptor
MOL002565	Medicarpin	Estrogen receptor beta
MOL002565	Medicarpin	Dipeptidyl peptidase IV
MOL002565	Medicarpin	Mitogen-activated protein kinase 10
MOL002565	Medicarpin	Heat shock protein HSP 90
MOL002565	Medicarpin	Cell division protein kinase 2
MOL002565	Medicarpin	Phosphatidylinositol-4,5-bisphosphate 3-kinase catalytic subunit, gamma isoform
MOL002565	Medicarpin	Neuronal acetylcholine receptor protein, alpha-7 chain
MOL002565	Medicarpin	mRNA of PKA Catalytic Subunit C-alpha
MOL002565	Medicarpin	Trypsin-1
MOL002565	Medicarpin	Proto-oncogene serine/threonine-protein kinase Pim-1
MOL002565	Medicarpin	Cyclin-A2
MOL002565	Medicarpin	Calmodulin
MOL002565	Medicarpin	Delta-type opioid receptor
MOL002565	Medicarpin	CGMP-inhibited 3',5'-cyclic phosphodiesterase A
MOL002565	Medicarpin	Alpha-1D adrenergic receptor
MOL003656	Lupiwighteone	Nitric oxide synthase, inducible
MOL003656	Lupiwighteone	Thrombin
MOL003656	Lupiwighteone	Estrogen receptor
MOL003656	Lupiwighteone	Androgen receptor
MOL003656	Lupiwighteone	Sodium channel protein type 5 subunit alpha
MOL003656	Lupiwighteone	Peroxisome proliferator activated receptor gamma
MOL003656	Lupiwighteone	Coagulation factor Xa
MOL003656	Lupiwighteone	Prostaglandin G/H synthase 2
MOL003656	Lupiwighteone	DNA topoisomerase II
MOL003656	Lupiwighteone	Estrogen receptor beta
MOL003656	Lupiwighteone	Dipeptidyl peptidase IV
MOL003656	Lupiwighteone	Mitogen-activated protein kinase 14
MOL003656	Lupiwighteone	Glycogen synthase kinase-3 beta
MOL003656	Lupiwighteone	Heat shock protein HSP 90
MOL003656	Lupiwighteone	Cell division protein kinase 2
MOL003656	Lupiwighteone	Serine/threonine-protein kinase Chk1
MOL003656	Lupiwighteone	Trypsin-1
MOL003656	Lupiwighteone	Proto-oncogene serine/threonine-protein kinase Pim-1
MOL003656	Lupiwighteone	Cyclin-A2
MOL003656	Lupiwighteone	Nuclear receptor coactivator 2
MOL003656	Lupiwighteone	Calmodulin
MOL003896	7-Methoxy-2-methyl isoflavone	Nitric oxide synthase, inducible
MOL003896	7-Methoxy-2-methyl isoflavone	Prostaglandin G/H synthase 1
MOL003896	7-Methoxy-2-methyl isoflavone	Dopamine D1 receptor
MOL003896	7-Methoxy-2-methyl isoflavone	Muscarinic acetylcholine receptor M3
MOL003896	7-Methoxy-2-methyl isoflavone	Thrombin
MOL003896	7-Methoxy-2-methyl isoflavone	Muscarinic acetylcholine receptor M1
MOL003896	7-Methoxy-2-methyl isoflavone	Estrogen receptor
MOL003896	7-Methoxy-2-methyl isoflavone	Androgen receptor
MOL003896	7-Methoxy-2-methyl isoflavone	Beta-1 adrenergic receptor
MOL003896	7-Methoxy-2-methyl isoflavone	Sodium channel protein type 5 subunit alpha
MOL003896	7-Methoxy-2-methyl isoflavone	Peroxisome proliferator activated receptor gamma
MOL003896	7-Methoxy-2-methyl isoflavone	Prostaglandin G/H synthase 2
MOL003896	7-Methoxy-2-methyl isoflavone	Retinoic acid receptor RXR-alpha
MOL003896	7-Methoxy-2-methyl isoflavone	Acetylcholinesterase
MOL003896	7-Methoxy-2-methyl isoflavone	CGMP-inhibited 3',5'-cyclic phosphodiesterase A
MOL003896	7-Methoxy-2-methyl isoflavone	Alpha-1B adrenergic receptor
MOL003896	7-Methoxy-2-methyl isoflavone	Sodium-dependent dopamine transporter
MOL003896	7-Methoxy-2-methyl isoflavone	Beta-2 adrenergic receptor
MOL003896	7-Methoxy-2-methyl isoflavone	Alpha-1D adrenergic receptor
MOL003896	7-Methoxy-2-methyl isoflavone	Sodium-dependent serotonin transporter
MOL003896	7-Methoxy-2-methyl isoflavone	Estrogen receptor beta
MOL003896	7-Methoxy-2-methyl isoflavone	Gamma-aminobutyric acid receptor subunit alpha-1
MOL003896	7-Methoxy-2-methyl isoflavone	Dipeptidyl peptidase IV
MOL003896	7-Methoxy-2-methyl isoflavone	Mitogen-activated protein kinase 14
MOL003896	7-Methoxy-2-methyl isoflavone	Glycogen synthase kinase-3 beta
MOL003896	7-Methoxy-2-methyl isoflavone	Heat shock protein HSP 90
MOL003896	7-Methoxy-2-methyl isoflavone	Cell division protein kinase 2
MOL003896	7-Methoxy-2-methyl isoflavone	Leukotriene A-4 hydrolase
MOL003896	7-Methoxy-2-methyl isoflavone	Amine oxidase [flavin-containing] B
MOL003896	7-Methoxy-2-methyl isoflavone	Neuronal acetylcholine receptor protein, alpha-7 chain
MOL003896	7-Methoxy-2-methyl isoflavone	Serine/threonine-protein kinase Chk1
MOL003896	7-Methoxy-2-methyl isoflavone	mRNA of PKA Catalytic Subunit C-alpha
MOL003896	7-Methoxy-2-methyl isoflavone	Ig gamma-1 chain C region
MOL003896	7-Methoxy-2-methyl isoflavone	Trypsin-1
MOL003896	7-Methoxy-2-methyl isoflavone	Proto-oncogene serine/threonine-protein kinase Pim-1
MOL003896	7-Methoxy-2-methyl isoflavone	Cyclin-A2
MOL003896	7-Methoxy-2-methyl isoflavone	Nuclear receptor coactivator 1
MOL003896	7-Methoxy-2-methyl isoflavone	cAMP-dependent protein kinase inhibitor alpha
MOL003896	7-Methoxy-2-methyl isoflavone	Calmodulin
MOL003896	7-Methoxy-2-methyl isoflavone	Muscarinic acetylcholine receptor M5
MOL003896	7-Methoxy-2-methyl isoflavone	Nitric-oxide synthase, endothelial
MOL003896	7-Methoxy-2-methyl isoflavone	Mu-type opioid receptor
MOL003896	7-Methoxy-2-methyl isoflavone	Nuclear receptor coactivator 2
MOL004328	naringenin	Prostaglandin G/H synthase 1
MOL004328	naringenin	Estrogen receptor
MOL004328	naringenin	Prostaglandin G/H synthase 2
MOL004328	naringenin	Heat shock protein HSP 90
MOL004328	naringenin	Beta-lactamase
MOL004328	naringenin	mRNA of PKA Catalytic Subunit C-alpha
MOL004328	naringenin	Phosphatidylinositol-4,5-bisphosphate 3-kinase catalytic subunit, gamma isoform
MOL004328	naringenin	Transcription factor p65
MOL004328	naringenin	RAC-alpha serine/threonine-protein kinase
MOL004328	naringenin	Apoptosis regulator Bcl-2
MOL004328	naringenin	Mitogen-activated protein kinase 3
MOL004328	naringenin	Mitogen-activated protein kinase 1
MOL004328	naringenin	Caspase-3
MOL004328	naringenin	Fatty acid synthase
MOL004328	naringenin	Low-density lipoprotein receptor
MOL004328	naringenin	Bcl2 antagonist of cell death
MOL004328	naringenin	Superoxide dismutase [Cu-Zn]
MOL004328	naringenin	Catalase
MOL004328	naringenin	Peroxisome proliferator-activated receptor gamma
MOL004328	naringenin	Microsomal triglyceride transfer protein large subunit
MOL004328	naringenin	Apolipoprotein B-100
MOL004328	naringenin	Phospholipase B1, membrane-associated
MOL004328	naringenin	3-hydroxy-3-methylglutaryl-coenzyme A reductase
MOL004328	naringenin	Cytochrome P450 19A1
MOL004328	naringenin	Glutathione S-transferase P
MOL004328	naringenin	UDP-glucuronosyltransferase 1-1
MOL004328	naringenin	Peroxisome proliferator-activated receptor alpha
MOL004328	naringenin	Sterol regulatory element-binding protein 1
MOL004328	naringenin	Glutathione reductase, mitochondrial
MOL004328	naringenin	Multidrug resistance-associated protein 1
MOL004328	naringenin	Adiponectin
MOL004328	naringenin	Sterol O-acyltransferase 2
MOL004328	naringenin	Aldo-keto reductase family 1 member C1
MOL004328	naringenin	Aspartate aminotransferase, cytoplasmic
MOL004328	naringenin	4-aminobutyrate aminotransferase, mitochondrial
MOL004328	naringenin	Liver carboxylesterase 1
MOL004328	naringenin	Sterol O-acyltransferase 1
MOL004805	(2S)-2-[4-hydroxy-3-(3-methylbut-2-enyl)phenyl]-8,8-dimethyl-2,3-dihydropyrano[2,3-f]chromen-4-one	Nitric oxide synthase, inducible
MOL004805	(2S)-2-[4-hydroxy-3-(3-methylbut-2-enyl)phenyl]-8,8-dimethyl-2,3-dihydropyrano[2,3-f]chromen-4-one	Potassium voltage-gated channel subfamily H member 2
MOL004805	(2S)-2-[4-hydroxy-3-(3-methylbut-2-enyl)phenyl]-8,8-dimethyl-2,3-dihydropyrano[2,3-f]chromen-4-one	Estrogen receptor
MOL004805	(2S)-2-[4-hydroxy-3-(3-methylbut-2-enyl)phenyl]-8,8-dimethyl-2,3-dihydropyrano[2,3-f]chromen-4-one	Androgen receptor
MOL004805	(2S)-2-[4-hydroxy-3-(3-methylbut-2-enyl)phenyl]-8,8-dimethyl-2,3-dihydropyrano[2,3-f]chromen-4-one	Peroxisome proliferator activated receptor gamma
MOL004805	(2S)-2-[4-hydroxy-3-(3-methylbut-2-enyl)phenyl]-8,8-dimethyl-2,3-dihydropyrano[2,3-f]chromen-4-one	Coagulation factor Xa
MOL004805	(2S)-2-[4-hydroxy-3-(3-methylbut-2-enyl)phenyl]-8,8-dimethyl-2,3-dihydropyrano[2,3-f]chromen-4-one	Prostaglandin G/H synthase 2
MOL004805	(2S)-2-[4-hydroxy-3-(3-methylbut-2-enyl)phenyl]-8,8-dimethyl-2,3-dihydropyrano[2,3-f]chromen-4-one	Estrogen receptor beta
MOL004805	(2S)-2-[4-hydroxy-3-(3-methylbut-2-enyl)phenyl]-8,8-dimethyl-2,3-dihydropyrano[2,3-f]chromen-4-one	Mitogen-activated protein kinase 14
MOL004805	(2S)-2-[4-hydroxy-3-(3-methylbut-2-enyl)phenyl]-8,8-dimethyl-2,3-dihydropyrano[2,3-f]chromen-4-one	Glycogen synthase kinase-3 beta
MOL004805	(2S)-2-[4-hydroxy-3-(3-methylbut-2-enyl)phenyl]-8,8-dimethyl-2,3-dihydropyrano[2,3-f]chromen-4-one	Proto-oncogene serine/threonine-protein kinase Pim-1
MOL004805	(2S)-2-[4-hydroxy-3-(3-methylbut-2-enyl)phenyl]-8,8-dimethyl-2,3-dihydropyrano[2,3-f]chromen-4-one	Calmodulin
MOL004806	euchrenone	Nitric oxide synthase, inducible
MOL004806	euchrenone	Potassium voltage-gated channel subfamily H member 2
MOL004806	euchrenone	Estrogen receptor
MOL004806	euchrenone	Sodium channel protein type 5 subunit alpha
MOL004806	euchrenone	Coagulation factor Xa
MOL004806	euchrenone	Prostaglandin G/H synthase 2
MOL004806	euchrenone	Estrogen receptor beta
MOL004806	euchrenone	Beta-secretase
MOL004806	euchrenone	Proto-oncogene serine/threonine-protein kinase Pim-1
MOL004806	euchrenone	Calmodulin
MOL004808	glyasperin B	Nitric oxide synthase, inducible
MOL004808	glyasperin B	Thrombin
MOL004808	glyasperin B	Estrogen receptor
MOL004808	glyasperin B	Androgen receptor
MOL004808	glyasperin B	Peroxisome proliferator activated receptor gamma
MOL004808	glyasperin B	Coagulation factor Xa
MOL004808	glyasperin B	Prostaglandin G/H synthase 2
MOL004808	glyasperin B	Coagulation factor VII
MOL004808	glyasperin B	Vascular endothelial growth factor receptor 2
MOL004808	glyasperin B	Acetylcholinesterase
MOL004808	glyasperin B	DNA topoisomerase II
MOL004808	glyasperin B	Estrogen receptor beta
MOL004808	glyasperin B	Dipeptidyl peptidase IV
MOL004808	glyasperin B	Glycogen synthase kinase-3 beta
MOL004808	glyasperin B	Heat shock protein HSP 90
MOL004808	glyasperin B	Cell division protein kinase 2
MOL004808	glyasperin B	Trypsin-1
MOL004808	glyasperin B	Proto-oncogene serine/threonine-protein kinase Pim-1
MOL004808	glyasperin B	Cyclin-A2
MOL004808	glyasperin B	Nuclear receptor coactivator 2
MOL004808	glyasperin B	Calmodulin
MOL004810	glyasperin F	Nitric oxide synthase, inducible
MOL004810	glyasperin F	Prostaglandin G/H synthase 1
MOL004810	glyasperin F	Estrogen receptor
MOL004810	glyasperin F	Androgen receptor
MOL004810	glyasperin F	Sodium channel protein type 5 subunit alpha
MOL004810	glyasperin F	Peroxisome proliferator activated receptor gamma
MOL004810	glyasperin F	Coagulation factor Xa
MOL004810	glyasperin F	Prostaglandin G/H synthase 2
MOL004810	glyasperin F	DNA topoisomerase II
MOL004810	glyasperin F	Estrogen receptor beta
MOL004810	glyasperin F	Mitogen-activated protein kinase 14
MOL004810	glyasperin F	Glycogen synthase kinase-3 beta
MOL004810	glyasperin F	Heat shock protein HSP 90
MOL004810	glyasperin F	Cell division protein kinase 2
MOL004810	glyasperin F	Trypsin-1
MOL004810	glyasperin F	Proto-oncogene serine/threonine-protein kinase Pim-1
MOL004810	glyasperin F	Cyclin-A2
MOL004810	glyasperin F	Calmodulin
MOL004811	Glyasperin C	Nitric oxide synthase, inducible
MOL004811	Glyasperin C	Thrombin
MOL004811	Glyasperin C	Potassium voltage-gated channel subfamily H member 2
MOL004811	Glyasperin C	Estrogen receptor
MOL004811	Glyasperin C	Androgen receptor
MOL004811	Glyasperin C	Sodium channel protein type 5 subunit alpha
MOL004811	Glyasperin C	Peroxisome proliferator activated receptor gamma
MOL004811	Glyasperin C	Coagulation factor Xa
MOL004811	Glyasperin C	Prostaglandin G/H synthase 2
MOL004811	Glyasperin C	Retinoic acid receptor RXR-alpha
MOL004811	Glyasperin C	Acetylcholinesterase
MOL004811	Glyasperin C	DNA topoisomerase II
MOL004811	Glyasperin C	Estrogen receptor beta
MOL004811	Glyasperin C	Dipeptidyl peptidase IV
MOL004811	Glyasperin C	Mitogen-activated protein kinase 14
MOL004811	Glyasperin C	Glycogen synthase kinase-3 beta
MOL004811	Glyasperin C	Heat shock protein HSP 90
MOL004811	Glyasperin C	Cell division protein kinase 2
MOL004811	Glyasperin C	Serine/threonine-protein kinase Chk1
MOL004811	Glyasperin C	Trypsin-1
MOL004811	Glyasperin C	Proto-oncogene serine/threonine-protein kinase Pim-1
MOL004811	Glyasperin C	Cyclin-A2
MOL004811	Glyasperin C	Nuclear receptor coactivator 2
MOL004811	Glyasperin C	Calmodulin
MOL004814	Isotrifoliol	Nitric oxide synthase, inducible
MOL004814	Isotrifoliol	Estrogen receptor
MOL004814	Isotrifoliol	Androgen receptor
MOL004814	Isotrifoliol	Prostaglandin G/H synthase 2
MOL004814	Isotrifoliol	Estrogen receptor beta
MOL004814	Isotrifoliol	Mitogen-activated protein kinase 14
MOL004814	Isotrifoliol	Glycogen synthase kinase-3 beta
MOL004814	Isotrifoliol	Heat shock protein HSP 90
MOL004814	Isotrifoliol	Cell division protein kinase 2
MOL004814	Isotrifoliol	Phosphatidylinositol-4,5-bisphosphate 3-kinase catalytic subunit, gamma isoform
MOL004814	Isotrifoliol	Serine/threonine-protein kinase Chk1
MOL004814	Isotrifoliol	mRNA of PKA Catalytic Subunit C-alpha
MOL004814	Isotrifoliol	Proto-oncogene serine/threonine-protein kinase Pim-1
MOL004814	Isotrifoliol	Cyclin-A2
MOL004815	(E)-1-(2,4-dihydroxyphenyl)-3-(2,2-dimethylchromen-6-yl)prop-2-en-1-one	Nitric oxide synthase, inducible
MOL004815	(E)-1-(2,4-dihydroxyphenyl)-3-(2,2-dimethylchromen-6-yl)prop-2-en-1-one	Prostaglandin G/H synthase 1
MOL004815	(E)-1-(2,4-dihydroxyphenyl)-3-(2,2-dimethylchromen-6-yl)prop-2-en-1-one	Estrogen receptor
MOL004815	(E)-1-(2,4-dihydroxyphenyl)-3-(2,2-dimethylchromen-6-yl)prop-2-en-1-one	Androgen receptor
MOL004815	(E)-1-(2,4-dihydroxyphenyl)-3-(2,2-dimethylchromen-6-yl)prop-2-en-1-one	Sodium channel protein type 5 subunit alpha
MOL004815	(E)-1-(2,4-dihydroxyphenyl)-3-(2,2-dimethylchromen-6-yl)prop-2-en-1-one	Peroxisome proliferator activated receptor gamma
MOL004815	(E)-1-(2,4-dihydroxyphenyl)-3-(2,2-dimethylchromen-6-yl)prop-2-en-1-one	Coagulation factor Xa
MOL004815	(E)-1-(2,4-dihydroxyphenyl)-3-(2,2-dimethylchromen-6-yl)prop-2-en-1-one	Prostaglandin G/H synthase 2
MOL004815	(E)-1-(2,4-dihydroxyphenyl)-3-(2,2-dimethylchromen-6-yl)prop-2-en-1-one	Carbonic anhydrase II
MOL004815	(E)-1-(2,4-dihydroxyphenyl)-3-(2,2-dimethylchromen-6-yl)prop-2-en-1-one	Retinoic acid receptor RXR-alpha
MOL004815	(E)-1-(2,4-dihydroxyphenyl)-3-(2,2-dimethylchromen-6-yl)prop-2-en-1-one	Alpha-1B adrenergic receptor
MOL004815	(E)-1-(2,4-dihydroxyphenyl)-3-(2,2-dimethylchromen-6-yl)prop-2-en-1-one	Estrogen receptor beta
MOL004815	(E)-1-(2,4-dihydroxyphenyl)-3-(2,2-dimethylchromen-6-yl)prop-2-en-1-one	Mitogen-activated protein kinase 14
MOL004815	(E)-1-(2,4-dihydroxyphenyl)-3-(2,2-dimethylchromen-6-yl)prop-2-en-1-one	Glycogen synthase kinase-3 beta
MOL004815	(E)-1-(2,4-dihydroxyphenyl)-3-(2,2-dimethylchromen-6-yl)prop-2-en-1-one	Cell division protein kinase 2
MOL004815	(E)-1-(2,4-dihydroxyphenyl)-3-(2,2-dimethylchromen-6-yl)prop-2-en-1-one	Serine/threonine-protein kinase Chk1
MOL004815	(E)-1-(2,4-dihydroxyphenyl)-3-(2,2-dimethylchromen-6-yl)prop-2-en-1-one	Proto-oncogene serine/threonine-protein kinase Pim-1
MOL004815	(E)-1-(2,4-dihydroxyphenyl)-3-(2,2-dimethylchromen-6-yl)prop-2-en-1-one	Cyclin-A2
MOL004815	(E)-1-(2,4-dihydroxyphenyl)-3-(2,2-dimethylchromen-6-yl)prop-2-en-1-one	Nuclear receptor coactivator 2
MOL004815	(E)-1-(2,4-dihydroxyphenyl)-3-(2,2-dimethylchromen-6-yl)prop-2-en-1-one	Calmodulin
MOL004820	kanzonols W	Nitric oxide synthase, inducible
MOL004820	kanzonols W	Prostaglandin G/H synthase 1
MOL004820	kanzonols W	Estrogen receptor
MOL004820	kanzonols W	Androgen receptor
MOL004820	kanzonols W	Sodium channel protein type 5 subunit alpha
MOL004820	kanzonols W	Peroxisome proliferator activated receptor gamma
MOL004820	kanzonols W	Coagulation factor Xa
MOL004820	kanzonols W	Prostaglandin G/H synthase 2
MOL004820	kanzonols W	Retinoic acid receptor RXR-alpha
MOL004820	kanzonols W	DNA topoisomerase II
MOL004820	kanzonols W	Estrogen receptor beta
MOL004820	kanzonols W	Mitogen-activated protein kinase 14
MOL004820	kanzonols W	Glycogen synthase kinase-3 beta
MOL004820	kanzonols W	Cell division protein kinase 2
MOL004820	kanzonols W	Serine/threonine-protein kinase Chk1
MOL004820	kanzonols W	Trypsin-1
MOL004820	kanzonols W	Proto-oncogene serine/threonine-protein kinase Pim-1
MOL004820	kanzonols W	Cyclin-A2
MOL004820	kanzonols W	Nuclear receptor coactivator 2
MOL004820	kanzonols W	Nuclear receptor coactivator 1
MOL004820	kanzonols W	Calmodulin
MOL004824	(2S)-6-(2,4-dihydroxyphenyl)-2-(2-hydroxypropan-2-yl)-4-methoxy-2,3-dihydrofuro[3,2-g]chromen-7-one	Nitric oxide synthase, inducible
MOL004824	(2S)-6-(2,4-dihydroxyphenyl)-2-(2-hydroxypropan-2-yl)-4-methoxy-2,3-dihydrofuro[3,2-g]chromen-7-one	Thrombin
MOL004824	(2S)-6-(2,4-dihydroxyphenyl)-2-(2-hydroxypropan-2-yl)-4-methoxy-2,3-dihydrofuro[3,2-g]chromen-7-one	Estrogen receptor
MOL004824	(2S)-6-(2,4-dihydroxyphenyl)-2-(2-hydroxypropan-2-yl)-4-methoxy-2,3-dihydrofuro[3,2-g]chromen-7-one	Androgen receptor
MOL004824	(2S)-6-(2,4-dihydroxyphenyl)-2-(2-hydroxypropan-2-yl)-4-methoxy-2,3-dihydrofuro[3,2-g]chromen-7-one	Peroxisome proliferator activated receptor gamma
MOL004824	(2S)-6-(2,4-dihydroxyphenyl)-2-(2-hydroxypropan-2-yl)-4-methoxy-2,3-dihydrofuro[3,2-g]chromen-7-one	Coagulation factor Xa
MOL004824	(2S)-6-(2,4-dihydroxyphenyl)-2-(2-hydroxypropan-2-yl)-4-methoxy-2,3-dihydrofuro[3,2-g]chromen-7-one	Prostaglandin G/H synthase 2
MOL004824	(2S)-6-(2,4-dihydroxyphenyl)-2-(2-hydroxypropan-2-yl)-4-methoxy-2,3-dihydrofuro[3,2-g]chromen-7-one	Coagulation factor VII
MOL004824	(2S)-6-(2,4-dihydroxyphenyl)-2-(2-hydroxypropan-2-yl)-4-methoxy-2,3-dihydrofuro[3,2-g]chromen-7-one	Vascular endothelial growth factor receptor 2
MOL004824	(2S)-6-(2,4-dihydroxyphenyl)-2-(2-hydroxypropan-2-yl)-4-methoxy-2,3-dihydrofuro[3,2-g]chromen-7-one	Acetylcholinesterase
MOL004824	(2S)-6-(2,4-dihydroxyphenyl)-2-(2-hydroxypropan-2-yl)-4-methoxy-2,3-dihydrofuro[3,2-g]chromen-7-one	DNA topoisomerase II
MOL004824	(2S)-6-(2,4-dihydroxyphenyl)-2-(2-hydroxypropan-2-yl)-4-methoxy-2,3-dihydrofuro[3,2-g]chromen-7-one	Estrogen receptor beta
MOL004824	(2S)-6-(2,4-dihydroxyphenyl)-2-(2-hydroxypropan-2-yl)-4-methoxy-2,3-dihydrofuro[3,2-g]chromen-7-one	Dipeptidyl peptidase IV
MOL004824	(2S)-6-(2,4-dihydroxyphenyl)-2-(2-hydroxypropan-2-yl)-4-methoxy-2,3-dihydrofuro[3,2-g]chromen-7-one	Mitogen-activated protein kinase 14
MOL004824	(2S)-6-(2,4-dihydroxyphenyl)-2-(2-hydroxypropan-2-yl)-4-methoxy-2,3-dihydrofuro[3,2-g]chromen-7-one	Glycogen synthase kinase-3 beta
MOL004824	(2S)-6-(2,4-dihydroxyphenyl)-2-(2-hydroxypropan-2-yl)-4-methoxy-2,3-dihydrofuro[3,2-g]chromen-7-one	Cell division protein kinase 2
MOL004824	(2S)-6-(2,4-dihydroxyphenyl)-2-(2-hydroxypropan-2-yl)-4-methoxy-2,3-dihydrofuro[3,2-g]chromen-7-one	Serine/threonine-protein kinase Chk1
MOL004824	(2S)-6-(2,4-dihydroxyphenyl)-2-(2-hydroxypropan-2-yl)-4-methoxy-2,3-dihydrofuro[3,2-g]chromen-7-one	Trypsin-1
MOL004824	(2S)-6-(2,4-dihydroxyphenyl)-2-(2-hydroxypropan-2-yl)-4-methoxy-2,3-dihydrofuro[3,2-g]chromen-7-one	Proto-oncogene serine/threonine-protein kinase Pim-1
MOL004824	(2S)-6-(2,4-dihydroxyphenyl)-2-(2-hydroxypropan-2-yl)-4-methoxy-2,3-dihydrofuro[3,2-g]chromen-7-one	Cyclin-A2
MOL004824	(2S)-6-(2,4-dihydroxyphenyl)-2-(2-hydroxypropan-2-yl)-4-methoxy-2,3-dihydrofuro[3,2-g]chromen-7-one	Calmodulin
MOL004827	Semilicoisoflavone B	Nitric oxide synthase, inducible
MOL004827	Semilicoisoflavone B	Thrombin
MOL004827	Semilicoisoflavone B	Estrogen receptor
MOL004827	Semilicoisoflavone B	Androgen receptor
MOL004827	Semilicoisoflavone B	Sodium channel protein type 5 subunit alpha
MOL004827	Semilicoisoflavone B	Peroxisome proliferator activated receptor gamma
MOL004827	Semilicoisoflavone B	Coagulation factor Xa
MOL004827	Semilicoisoflavone B	Prostaglandin G/H synthase 2
MOL004827	Semilicoisoflavone B	Coagulation factor VII
MOL004827	Semilicoisoflavone B	Acetylcholinesterase
MOL004827	Semilicoisoflavone B	DNA topoisomerase II
MOL004827	Semilicoisoflavone B	Glycogen synthase kinase-3 beta
MOL004827	Semilicoisoflavone B	Heat shock protein HSP 90
MOL004827	Semilicoisoflavone B	Cell division protein kinase 2
MOL004827	Semilicoisoflavone B	Serine/threonine-protein kinase Chk1
MOL004827	Semilicoisoflavone B	Trypsin-1
MOL004827	Semilicoisoflavone B	Calmodulin
MOL004828	Glepidotin A	Nitric oxide synthase, inducible
MOL004828	Glepidotin A	Prostaglandin G/H synthase 1
MOL004828	Glepidotin A	Thrombin
MOL004828	Glepidotin A	Estrogen receptor
MOL004828	Glepidotin A	Androgen receptor
MOL004828	Glepidotin A	Sodium channel protein type 5 subunit alpha
MOL004828	Glepidotin A	Peroxisome proliferator activated receptor gamma
MOL004828	Glepidotin A	Coagulation factor Xa
MOL004828	Glepidotin A	Prostaglandin G/H synthase 2
MOL004828	Glepidotin A	Nitric-oxide synthase, endothelial
MOL004828	Glepidotin A	Coagulation factor VII
MOL004828	Glepidotin A	Vascular endothelial growth factor receptor 2
MOL004828	Glepidotin A	Retinoic acid receptor RXR-alpha
MOL004828	Glepidotin A	CGMP-inhibited 3',5'-cyclic phosphodiesterase A
MOL004828	Glepidotin A	DNA topoisomerase II
MOL004828	Glepidotin A	Dipeptidyl peptidase IV
MOL004828	Glepidotin A	Mitogen-activated protein kinase 14
MOL004828	Glepidotin A	Glycogen synthase kinase-3 beta
MOL004828	Glepidotin A	Heat shock protein HSP 90
MOL004828	Glepidotin A	Cell division protein kinase 2
MOL004828	Glepidotin A	Serine/threonine-protein kinase Chk1
MOL004828	Glepidotin A	Ig gamma-1 chain C region
MOL004828	Glepidotin A	Trypsin-1
MOL004828	Glepidotin A	Proto-oncogene serine/threonine-protein kinase Pim-1
MOL004828	Glepidotin A	Cyclin-A2
MOL004828	Glepidotin A	Calmodulin
MOL004829	Glepidotin B	Prostaglandin G/H synthase 1
MOL004829	Glepidotin B	Estrogen receptor
MOL004829	Glepidotin B	Sodium channel protein type 5 subunit alpha
MOL004829	Glepidotin B	Coagulation factor Xa
MOL004829	Glepidotin B	Prostaglandin G/H synthase 2
MOL004829	Glepidotin B	Nitric-oxide synthase, endothelial
MOL004829	Glepidotin B	Coagulation factor VII
MOL004829	Glepidotin B	Retinoic acid receptor RXR-alpha
MOL004829	Glepidotin B	CGMP-inhibited 3',5'-cyclic phosphodiesterase A
MOL004829	Glepidotin B	Alpha-1B adrenergic receptor
MOL004829	Glepidotin B	DNA topoisomerase II
MOL004829	Glepidotin B	Heat shock protein HSP 90
MOL004829	Glepidotin B	Ig gamma-1 chain C region
MOL004829	Glepidotin B	Nuclear receptor coactivator 1
MOL004829	Glepidotin B	Calmodulin
MOL004833	Phaseolinisoflavan	Nitric oxide synthase, inducible
MOL004833	Phaseolinisoflavan	Muscarinic acetylcholine receptor M1
MOL004833	Phaseolinisoflavan	Estrogen receptor
MOL004833	Phaseolinisoflavan	Androgen receptor
MOL004833	Phaseolinisoflavan	Sodium channel protein type 5 subunit alpha
MOL004833	Phaseolinisoflavan	Peroxisome proliferator activated receptor gamma
MOL004833	Phaseolinisoflavan	Coagulation factor Xa
MOL004833	Phaseolinisoflavan	Prostaglandin G/H synthase 2
MOL004833	Phaseolinisoflavan	Retinoic acid receptor RXR-alpha
MOL004833	Phaseolinisoflavan	Acetylcholinesterase
MOL004833	Phaseolinisoflavan	Alpha-1B adrenergic receptor
MOL004833	Phaseolinisoflavan	Beta-2 adrenergic receptor
MOL004833	Phaseolinisoflavan	Estrogen receptor beta
MOL004833	Phaseolinisoflavan	Mitogen-activated protein kinase 14
MOL004833	Phaseolinisoflavan	Glycogen synthase kinase-3 beta
MOL004833	Phaseolinisoflavan	Cell division protein kinase 2
MOL004833	Phaseolinisoflavan	Serine/threonine-protein kinase Chk1
MOL004833	Phaseolinisoflavan	Trypsin-1
MOL004833	Phaseolinisoflavan	Proto-oncogene serine/threonine-protein kinase Pim-1
MOL004833	Phaseolinisoflavan	Cyclin-A2
MOL004833	Phaseolinisoflavan	Nuclear receptor coactivator 1
MOL004833	Phaseolinisoflavan	Calmodulin
MOL004835	Glypallichalcone	Nitric oxide synthase, inducible
MOL004835	Glypallichalcone	Prostaglandin G/H synthase 1
MOL004835	Glypallichalcone	Muscarinic acetylcholine receptor M1
MOL004835	Glypallichalcone	Estrogen receptor
MOL004835	Glypallichalcone	Androgen receptor
MOL004835	Glypallichalcone	Sodium channel protein type 5 subunit alpha
MOL004835	Glypallichalcone	Peroxisome proliferator activated receptor gamma
MOL004835	Glypallichalcone	Prostaglandin G/H synthase 2
MOL004835	Glypallichalcone	Carbonic anhydrase II
MOL004835	Glypallichalcone	CGMP-inhibited 3',5'-cyclic phosphodiesterase A
MOL004835	Glypallichalcone	Alpha-1B adrenergic receptor
MOL004835	Glypallichalcone	Sodium-dependent dopamine transporter
MOL004835	Glypallichalcone	Beta-2 adrenergic receptor
MOL004835	Glypallichalcone	Sodium-dependent serotonin transporter
MOL004835	Glypallichalcone	Estrogen receptor beta
MOL004835	Glypallichalcone	Mitogen-activated protein kinase 14
MOL004835	Glypallichalcone	Glycogen synthase kinase-3 beta
MOL004835	Glypallichalcone	Heat shock protein HSP 90
MOL004835	Glypallichalcone	Cell division protein kinase 2
MOL004835	Glypallichalcone	Leukotriene A-4 hydrolase
MOL004835	Glypallichalcone	Amine oxidase [flavin-containing] B
MOL004835	Glypallichalcone	Serine/threonine-protein kinase Chk1
MOL004835	Glypallichalcone	mRNA of PKA Catalytic Subunit C-alpha
MOL004835	Glypallichalcone	Cyclin-A2
MOL004835	Glypallichalcone	Nuclear receptor coactivator 1
MOL004835	Glypallichalcone	cAMP-dependent protein kinase inhibitor alpha
MOL004835	Glypallichalcone	Calmodulin
MOL004838	8-(6-hydroxy-2-benzofuranyl)-2,2-dimethyl-5-chromenol	Nitric oxide synthase, inducible
MOL004838	8-(6-hydroxy-2-benzofuranyl)-2,2-dimethyl-5-chromenol	Estrogen receptor
MOL004838	8-(6-hydroxy-2-benzofuranyl)-2,2-dimethyl-5-chromenol	Prostaglandin G/H synthase 2
MOL004838	8-(6-hydroxy-2-benzofuranyl)-2,2-dimethyl-5-chromenol	Retinoic acid receptor RXR-alpha
MOL004838	8-(6-hydroxy-2-benzofuranyl)-2,2-dimethyl-5-chromenol	Heat shock protein HSP 90
MOL004838	8-(6-hydroxy-2-benzofuranyl)-2,2-dimethyl-5-chromenol	Phosphatidylinositol-4,5-bisphosphate 3-kinase catalytic subunit, gamma isoform
MOL004841	Licochalcone B	Nitric oxide synthase, inducible
MOL004841	Licochalcone B	Prostaglandin G/H synthase 1
MOL004841	Licochalcone B	Estrogen receptor
MOL004841	Licochalcone B	Androgen receptor
MOL004841	Licochalcone B	Peroxisome proliferator activated receptor gamma
MOL004841	Licochalcone B	Prostaglandin G/H synthase 2
MOL004841	Licochalcone B	Carbonic anhydrase II
MOL004841	Licochalcone B	CGMP-inhibited 3',5'-cyclic phosphodiesterase A
MOL004841	Licochalcone B	Beta-2 adrenergic receptor
MOL004841	Licochalcone B	Estrogen receptor beta
MOL004841	Licochalcone B	Mitogen-activated protein kinase 14
MOL004841	Licochalcone B	Glycogen synthase kinase-3 beta
MOL004841	Licochalcone B	Heat shock protein HSP 90
MOL004841	Licochalcone B	Cell division protein kinase 2
MOL004841	Licochalcone B	Serine/threonine-protein kinase Chk1
MOL004841	Licochalcone B	mRNA of PKA Catalytic Subunit C-alpha
MOL004841	Licochalcone B	Proto-oncogene serine/threonine-protein kinase Pim-1
MOL004841	Licochalcone B	Cyclin-A2
MOL004841	Licochalcone B	Calmodulin
MOL004848	licochalcone G	Nitric oxide synthase, inducible
MOL004848	licochalcone G	Estrogen receptor
MOL004848	licochalcone G	Androgen receptor
MOL004848	licochalcone G	Peroxisome proliferator activated receptor gamma
MOL004848	licochalcone G	Coagulation factor Xa
MOL004848	licochalcone G	Prostaglandin G/H synthase 2
MOL004848	licochalcone G	Vascular endothelial growth factor receptor 2
MOL004848	licochalcone G	Estrogen receptor beta
MOL004848	licochalcone G	Mitogen-activated protein kinase 14
MOL004848	licochalcone G	Glycogen synthase kinase-3 beta
MOL004848	licochalcone G	Heat shock protein HSP 90
MOL004848	licochalcone G	Cell division protein kinase 2
MOL004848	licochalcone G	Ig gamma-1 chain C region
MOL004848	licochalcone G	Proto-oncogene serine/threonine-protein kinase Pim-1
MOL004848	licochalcone G	Cyclin-A2
MOL004848	licochalcone G	Nuclear receptor coactivator 2
MOL004848	licochalcone G	Calmodulin
MOL004849	3-(2,4-dihydroxyphenyl)-8-(1,1-dimethylprop-2-enyl)-7-hydroxy-5-methoxy-coumarin	Nitric oxide synthase, inducible
MOL004849	3-(2,4-dihydroxyphenyl)-8-(1,1-dimethylprop-2-enyl)-7-hydroxy-5-methoxy-coumarin	Thrombin
MOL004849	3-(2,4-dihydroxyphenyl)-8-(1,1-dimethylprop-2-enyl)-7-hydroxy-5-methoxy-coumarin	Potassium voltage-gated channel subfamily H member 2
MOL004849	3-(2,4-dihydroxyphenyl)-8-(1,1-dimethylprop-2-enyl)-7-hydroxy-5-methoxy-coumarin	Estrogen receptor
MOL004849	3-(2,4-dihydroxyphenyl)-8-(1,1-dimethylprop-2-enyl)-7-hydroxy-5-methoxy-coumarin	Androgen receptor
MOL004849	3-(2,4-dihydroxyphenyl)-8-(1,1-dimethylprop-2-enyl)-7-hydroxy-5-methoxy-coumarin	Peroxisome proliferator activated receptor gamma
MOL004849	3-(2,4-dihydroxyphenyl)-8-(1,1-dimethylprop-2-enyl)-7-hydroxy-5-methoxy-coumarin	Coagulation factor Xa
MOL004849	3-(2,4-dihydroxyphenyl)-8-(1,1-dimethylprop-2-enyl)-7-hydroxy-5-methoxy-coumarin	Prostaglandin G/H synthase 2
MOL004849	3-(2,4-dihydroxyphenyl)-8-(1,1-dimethylprop-2-enyl)-7-hydroxy-5-methoxy-coumarin	Coagulation factor VII
MOL004849	3-(2,4-dihydroxyphenyl)-8-(1,1-dimethylprop-2-enyl)-7-hydroxy-5-methoxy-coumarin	Vascular endothelial growth factor receptor 2
MOL004849	3-(2,4-dihydroxyphenyl)-8-(1,1-dimethylprop-2-enyl)-7-hydroxy-5-methoxy-coumarin	DNA topoisomerase II
MOL004849	3-(2,4-dihydroxyphenyl)-8-(1,1-dimethylprop-2-enyl)-7-hydroxy-5-methoxy-coumarin	Estrogen receptor beta
MOL004849	3-(2,4-dihydroxyphenyl)-8-(1,1-dimethylprop-2-enyl)-7-hydroxy-5-methoxy-coumarin	Dipeptidyl peptidase IV
MOL004849	3-(2,4-dihydroxyphenyl)-8-(1,1-dimethylprop-2-enyl)-7-hydroxy-5-methoxy-coumarin	Mitogen-activated protein kinase 14
MOL004849	3-(2,4-dihydroxyphenyl)-8-(1,1-dimethylprop-2-enyl)-7-hydroxy-5-methoxy-coumarin	Glycogen synthase kinase-3 beta
MOL004849	3-(2,4-dihydroxyphenyl)-8-(1,1-dimethylprop-2-enyl)-7-hydroxy-5-methoxy-coumarin	Heat shock protein HSP 90
MOL004849	3-(2,4-dihydroxyphenyl)-8-(1,1-dimethylprop-2-enyl)-7-hydroxy-5-methoxy-coumarin	Cell division protein kinase 2
MOL004849	3-(2,4-dihydroxyphenyl)-8-(1,1-dimethylprop-2-enyl)-7-hydroxy-5-methoxy-coumarin	Serine/threonine-protein kinase Chk1
MOL004849	3-(2,4-dihydroxyphenyl)-8-(1,1-dimethylprop-2-enyl)-7-hydroxy-5-methoxy-coumarin	Trypsin-1
MOL004849	3-(2,4-dihydroxyphenyl)-8-(1,1-dimethylprop-2-enyl)-7-hydroxy-5-methoxy-coumarin	Proto-oncogene serine/threonine-protein kinase Pim-1
MOL004849	3-(2,4-dihydroxyphenyl)-8-(1,1-dimethylprop-2-enyl)-7-hydroxy-5-methoxy-coumarin	Nuclear receptor coactivator 2
MOL004849	3-(2,4-dihydroxyphenyl)-8-(1,1-dimethylprop-2-enyl)-7-hydroxy-5-methoxy-coumarin	Nuclear receptor coactivator 1
MOL004849	3-(2,4-dihydroxyphenyl)-8-(1,1-dimethylprop-2-enyl)-7-hydroxy-5-methoxy-coumarin	Calmodulin
MOL004855	Licoricone	Nitric oxide synthase, inducible
MOL004855	Licoricone	Thrombin
MOL004855	Licoricone	Potassium voltage-gated channel subfamily H member 2
MOL004855	Licoricone	Estrogen receptor
MOL004855	Licoricone	Androgen receptor
MOL004855	Licoricone	Peroxisome proliferator activated receptor gamma
MOL004855	Licoricone	Coagulation factor Xa
MOL004855	Licoricone	Prostaglandin G/H synthase 2
MOL004855	Licoricone	Vascular endothelial growth factor receptor 2
MOL004855	Licoricone	DNA topoisomerase II
MOL004855	Licoricone	Serine/threonine-protein kinase Chk1
MOL004855	Licoricone	Trypsin-1
MOL004855	Licoricone	Proto-oncogene serine/threonine-protein kinase Pim-1
MOL004855	Licoricone	Nuclear receptor coactivator 2
MOL004855	Licoricone	Calmodulin
MOL004856	Gancaonin A	Nitric oxide synthase, inducible
MOL004856	Gancaonin A	Thrombin
MOL004856	Gancaonin A	Estrogen receptor
MOL004856	Gancaonin A	Androgen receptor
MOL004856	Gancaonin A	Sodium channel protein type 5 subunit alpha
MOL004856	Gancaonin A	Peroxisome proliferator activated receptor gamma
MOL004856	Gancaonin A	Coagulation factor Xa
MOL004856	Gancaonin A	Prostaglandin G/H synthase 2
MOL004856	Gancaonin A	Acetylcholinesterase
MOL004856	Gancaonin A	DNA topoisomerase II
MOL004856	Gancaonin A	Estrogen receptor beta
MOL004856	Gancaonin A	Dipeptidyl peptidase IV
MOL004856	Gancaonin A	Glycogen synthase kinase-3 beta
MOL004856	Gancaonin A	Heat shock protein HSP 90
MOL004856	Gancaonin A	Serine/threonine-protein kinase Chk1
MOL004856	Gancaonin A	Trypsin-1
MOL004856	Gancaonin A	Proto-oncogene serine/threonine-protein kinase Pim-1
MOL004856	Gancaonin A	Cyclin-A2
MOL004856	Gancaonin A	Nuclear receptor coactivator 2
MOL004856	Gancaonin A	Calmodulin
MOL004857	Gancaonin B	Nitric oxide synthase, inducible
MOL004857	Gancaonin B	Thrombin
MOL004857	Gancaonin B	Estrogen receptor
MOL004857	Gancaonin B	Androgen receptor
MOL004857	Gancaonin B	Peroxisome proliferator activated receptor gamma
MOL004857	Gancaonin B	Coagulation factor Xa
MOL004857	Gancaonin B	Prostaglandin G/H synthase 2
MOL004857	Gancaonin B	Coagulation factor VII
MOL004857	Gancaonin B	Vascular endothelial growth factor receptor 2
MOL004857	Gancaonin B	Alpha-1B adrenergic receptor
MOL004857	Gancaonin B	Beta-2 adrenergic receptor
MOL004857	Gancaonin B	DNA topoisomerase II
MOL004857	Gancaonin B	Estrogen receptor beta
MOL004857	Gancaonin B	Dipeptidyl peptidase IV
MOL004857	Gancaonin B	Glycogen synthase kinase-3 beta
MOL004857	Gancaonin B	Heat shock protein HSP 90
MOL004857	Gancaonin B	Serine/threonine-protein kinase Chk1
MOL004857	Gancaonin B	Trypsin-1
MOL004857	Gancaonin B	Proto-oncogene serine/threonine-protein kinase Pim-1
MOL004857	Gancaonin B	Cyclin-A2
MOL004857	Gancaonin B	Nuclear receptor coactivator 2
MOL004857	Gancaonin B	Calmodulin
MOL004863	3-(3,4-dihydroxyphenyl)-5,7-dihydroxy-8-(3-methylbut-2-enyl)chromone	Nitric oxide synthase, inducible
MOL004863	3-(3,4-dihydroxyphenyl)-5,7-dihydroxy-8-(3-methylbut-2-enyl)chromone	Thrombin
MOL004863	3-(3,4-dihydroxyphenyl)-5,7-dihydroxy-8-(3-methylbut-2-enyl)chromone	Estrogen receptor
MOL004863	3-(3,4-dihydroxyphenyl)-5,7-dihydroxy-8-(3-methylbut-2-enyl)chromone	Androgen receptor
MOL004863	3-(3,4-dihydroxyphenyl)-5,7-dihydroxy-8-(3-methylbut-2-enyl)chromone	Peroxisome proliferator activated receptor gamma
MOL004863	3-(3,4-dihydroxyphenyl)-5,7-dihydroxy-8-(3-methylbut-2-enyl)chromone	Coagulation factor Xa
MOL004863	3-(3,4-dihydroxyphenyl)-5,7-dihydroxy-8-(3-methylbut-2-enyl)chromone	Prostaglandin G/H synthase 2
MOL004863	3-(3,4-dihydroxyphenyl)-5,7-dihydroxy-8-(3-methylbut-2-enyl)chromone	mRNA of Protein-tyrosine phosphatase, non-receptor type 1
MOL004863	3-(3,4-dihydroxyphenyl)-5,7-dihydroxy-8-(3-methylbut-2-enyl)chromone	Mitogen-activated protein kinase 14
MOL004863	3-(3,4-dihydroxyphenyl)-5,7-dihydroxy-8-(3-methylbut-2-enyl)chromone	Glycogen synthase kinase-3 beta
MOL004863	3-(3,4-dihydroxyphenyl)-5,7-dihydroxy-8-(3-methylbut-2-enyl)chromone	Heat shock protein HSP 90
MOL004863	3-(3,4-dihydroxyphenyl)-5,7-dihydroxy-8-(3-methylbut-2-enyl)chromone	Cell division protein kinase 2
MOL004863	3-(3,4-dihydroxyphenyl)-5,7-dihydroxy-8-(3-methylbut-2-enyl)chromone	Serine/threonine-protein kinase Chk1
MOL004863	3-(3,4-dihydroxyphenyl)-5,7-dihydroxy-8-(3-methylbut-2-enyl)chromone	Trypsin-1
MOL004863	3-(3,4-dihydroxyphenyl)-5,7-dihydroxy-8-(3-methylbut-2-enyl)chromone	Proto-oncogene serine/threonine-protein kinase Pim-1
MOL004863	3-(3,4-dihydroxyphenyl)-5,7-dihydroxy-8-(3-methylbut-2-enyl)chromone	Cyclin-A2
MOL004863	3-(3,4-dihydroxyphenyl)-5,7-dihydroxy-8-(3-methylbut-2-enyl)chromone	Nuclear receptor coactivator 2
MOL004863	3-(3,4-dihydroxyphenyl)-5,7-dihydroxy-8-(3-methylbut-2-enyl)chromone	Calmodulin
MOL004864	5,7-dihydroxy-3-(4-methoxyphenyl)-8-(3-methylbut-2-enyl)chromone	Nitric oxide synthase, inducible
MOL004864	5,7-dihydroxy-3-(4-methoxyphenyl)-8-(3-methylbut-2-enyl)chromone	Potassium voltage-gated channel subfamily H member 2
MOL004864	5,7-dihydroxy-3-(4-methoxyphenyl)-8-(3-methylbut-2-enyl)chromone	Estrogen receptor
MOL004864	5,7-dihydroxy-3-(4-methoxyphenyl)-8-(3-methylbut-2-enyl)chromone	Androgen receptor
MOL004864	5,7-dihydroxy-3-(4-methoxyphenyl)-8-(3-methylbut-2-enyl)chromone	Peroxisome proliferator activated receptor gamma
MOL004864	5,7-dihydroxy-3-(4-methoxyphenyl)-8-(3-methylbut-2-enyl)chromone	Coagulation factor Xa
MOL004864	5,7-dihydroxy-3-(4-methoxyphenyl)-8-(3-methylbut-2-enyl)chromone	Prostaglandin G/H synthase 2
MOL004864	5,7-dihydroxy-3-(4-methoxyphenyl)-8-(3-methylbut-2-enyl)chromone	DNA topoisomerase II
MOL004864	5,7-dihydroxy-3-(4-methoxyphenyl)-8-(3-methylbut-2-enyl)chromone	Estrogen receptor beta
MOL004864	5,7-dihydroxy-3-(4-methoxyphenyl)-8-(3-methylbut-2-enyl)chromone	Dipeptidyl peptidase IV
MOL004864	5,7-dihydroxy-3-(4-methoxyphenyl)-8-(3-methylbut-2-enyl)chromone	Mitogen-activated protein kinase 14
MOL004864	5,7-dihydroxy-3-(4-methoxyphenyl)-8-(3-methylbut-2-enyl)chromone	Glycogen synthase kinase-3 beta
MOL004864	5,7-dihydroxy-3-(4-methoxyphenyl)-8-(3-methylbut-2-enyl)chromone	Heat shock protein HSP 90
MOL004864	5,7-dihydroxy-3-(4-methoxyphenyl)-8-(3-methylbut-2-enyl)chromone	Cell division protein kinase 2
MOL004864	5,7-dihydroxy-3-(4-methoxyphenyl)-8-(3-methylbut-2-enyl)chromone	Serine/threonine-protein kinase Chk1
MOL004864	5,7-dihydroxy-3-(4-methoxyphenyl)-8-(3-methylbut-2-enyl)chromone	Trypsin-1
MOL004864	5,7-dihydroxy-3-(4-methoxyphenyl)-8-(3-methylbut-2-enyl)chromone	Proto-oncogene serine/threonine-protein kinase Pim-1
MOL004864	5,7-dihydroxy-3-(4-methoxyphenyl)-8-(3-methylbut-2-enyl)chromone	Cyclin-A2
MOL004864	5,7-dihydroxy-3-(4-methoxyphenyl)-8-(3-methylbut-2-enyl)chromone	Nuclear receptor coactivator 2
MOL004864	5,7-dihydroxy-3-(4-methoxyphenyl)-8-(3-methylbut-2-enyl)chromone	Calmodulin
MOL004866	2-(3,4-dihydroxyphenyl)-5,7-dihydroxy-6-(3-methylbut-2-enyl)chromone	Thrombin
MOL004866	2-(3,4-dihydroxyphenyl)-5,7-dihydroxy-6-(3-methylbut-2-enyl)chromone	Androgen receptor
MOL004866	2-(3,4-dihydroxyphenyl)-5,7-dihydroxy-6-(3-methylbut-2-enyl)chromone	Sodium channel protein type 5 subunit alpha
MOL004866	2-(3,4-dihydroxyphenyl)-5,7-dihydroxy-6-(3-methylbut-2-enyl)chromone	Peroxisome proliferator activated receptor gamma
MOL004866	2-(3,4-dihydroxyphenyl)-5,7-dihydroxy-6-(3-methylbut-2-enyl)chromone	Coagulation factor Xa
MOL004866	2-(3,4-dihydroxyphenyl)-5,7-dihydroxy-6-(3-methylbut-2-enyl)chromone	Prostaglandin G/H synthase 2
MOL004866	2-(3,4-dihydroxyphenyl)-5,7-dihydroxy-6-(3-methylbut-2-enyl)chromone	Coagulation factor VII
MOL004866	2-(3,4-dihydroxyphenyl)-5,7-dihydroxy-6-(3-methylbut-2-enyl)chromone	Beta-2 adrenergic receptor
MOL004866	2-(3,4-dihydroxyphenyl)-5,7-dihydroxy-6-(3-methylbut-2-enyl)chromone	Dipeptidyl peptidase IV
MOL004866	2-(3,4-dihydroxyphenyl)-5,7-dihydroxy-6-(3-methylbut-2-enyl)chromone	Heat shock protein HSP 90
MOL004866	2-(3,4-dihydroxyphenyl)-5,7-dihydroxy-6-(3-methylbut-2-enyl)chromone	Cell division protein kinase 2
MOL004866	2-(3,4-dihydroxyphenyl)-5,7-dihydroxy-6-(3-methylbut-2-enyl)chromone	Serine/threonine-protein kinase Chk1
MOL004866	2-(3,4-dihydroxyphenyl)-5,7-dihydroxy-6-(3-methylbut-2-enyl)chromone	Trypsin-1
MOL004866	2-(3,4-dihydroxyphenyl)-5,7-dihydroxy-6-(3-methylbut-2-enyl)chromone	Proto-oncogene serine/threonine-protein kinase Pim-1
MOL004866	2-(3,4-dihydroxyphenyl)-5,7-dihydroxy-6-(3-methylbut-2-enyl)chromone	Cyclin-A2
MOL004866	2-(3,4-dihydroxyphenyl)-5,7-dihydroxy-6-(3-methylbut-2-enyl)chromone	Calmodulin
MOL004879	Glycyrin	Nitric oxide synthase, inducible
MOL004879	Glycyrin	Thrombin
MOL004879	Glycyrin	Potassium voltage-gated channel subfamily H member 2
MOL004879	Glycyrin	Estrogen receptor
MOL004879	Glycyrin	Androgen receptor
MOL004879	Glycyrin	Peroxisome proliferator activated receptor gamma
MOL004879	Glycyrin	Coagulation factor Xa
MOL004879	Glycyrin	Prostaglandin G/H synthase 2
MOL004879	Glycyrin	Vascular endothelial growth factor receptor 2
MOL004879	Glycyrin	DNA topoisomerase II
MOL004879	Glycyrin	Estrogen receptor beta
MOL004879	Glycyrin	Dipeptidyl peptidase IV
MOL004879	Glycyrin	Serine/threonine-protein kinase Chk1
MOL004879	Glycyrin	Trypsin-1
MOL004879	Glycyrin	Proto-oncogene serine/threonine-protein kinase Pim-1
MOL004879	Glycyrin	Nuclear receptor coactivator 2
MOL004879	Glycyrin	Calmodulin
MOL004882	Licocoumarone	Estrogen receptor
MOL004882	Licocoumarone	Androgen receptor
MOL004882	Licocoumarone	Estrogen receptor beta
MOL004882	Licocoumarone	Glycogen synthase kinase-3 beta
MOL004882	Licocoumarone	Heat shock protein HSP 90
MOL004882	Licocoumarone	Cell division protein kinase 2
MOL004882	Licocoumarone	Cyclin-A2
MOL004883	Licoisoflavone	Nitric oxide synthase, inducible
MOL004883	Licoisoflavone	Thrombin
MOL004883	Licoisoflavone	Estrogen receptor
MOL004883	Licoisoflavone	Androgen receptor
MOL004883	Licoisoflavone	Peroxisome proliferator activated receptor gamma
MOL004883	Licoisoflavone	Coagulation factor Xa
MOL004883	Licoisoflavone	Prostaglandin G/H synthase 2
MOL004883	Licoisoflavone	Vascular endothelial growth factor receptor 2
MOL004883	Licoisoflavone	DNA topoisomerase II
MOL004883	Licoisoflavone	Dipeptidyl peptidase IV
MOL004883	Licoisoflavone	Mitogen-activated protein kinase 14
MOL004883	Licoisoflavone	Heat shock protein HSP 90
MOL004883	Licoisoflavone	Cell division protein kinase 2
MOL004883	Licoisoflavone	Serine/threonine-protein kinase Chk1
MOL004883	Licoisoflavone	Trypsin-1
MOL004883	Licoisoflavone	Proto-oncogene serine/threonine-protein kinase Pim-1
MOL004883	Licoisoflavone	Cyclin-A2
MOL004883	Licoisoflavone	Nuclear receptor coactivator 2
MOL004883	Licoisoflavone	Calmodulin
MOL004884	Licoisoflavone B	Nitric oxide synthase, inducible
MOL004884	Licoisoflavone B	Thrombin
MOL004884	Licoisoflavone B	Estrogen receptor
MOL004884	Licoisoflavone B	Androgen receptor
MOL004884	Licoisoflavone B	Peroxisome proliferator activated receptor gamma
MOL004884	Licoisoflavone B	Coagulation factor Xa
MOL004884	Licoisoflavone B	Prostaglandin G/H synthase 2
MOL004884	Licoisoflavone B	Acetylcholinesterase
MOL004884	Licoisoflavone B	DNA topoisomerase II
MOL004884	Licoisoflavone B	Estrogen receptor beta
MOL004884	Licoisoflavone B	Glycogen synthase kinase-3 beta
MOL004884	Licoisoflavone B	Cell division protein kinase 2
MOL004884	Licoisoflavone B	Serine/threonine-protein kinase Chk1
MOL004884	Licoisoflavone B	Trypsin-1
MOL004884	Licoisoflavone B	Proto-oncogene serine/threonine-protein kinase Pim-1
MOL004884	Licoisoflavone B	Cyclin-A2
MOL004884	Licoisoflavone B	Calmodulin
MOL004885	licoisoflavanone	Nitric oxide synthase, inducible
MOL004885	licoisoflavanone	Prostaglandin G/H synthase 1
MOL004885	licoisoflavanone	Estrogen receptor
MOL004885	licoisoflavanone	Androgen receptor
MOL004885	licoisoflavanone	Sodium channel protein type 5 subunit alpha
MOL004885	licoisoflavanone	Peroxisome proliferator activated receptor gamma
MOL004885	licoisoflavanone	Coagulation factor Xa
MOL004885	licoisoflavanone	Prostaglandin G/H synthase 2
MOL004885	licoisoflavanone	Coagulation factor VII
MOL004885	licoisoflavanone	Acetylcholinesterase
MOL004885	licoisoflavanone	DNA topoisomerase II
MOL004885	licoisoflavanone	Estrogen receptor beta
MOL004885	licoisoflavanone	Glycogen synthase kinase-3 beta
MOL004885	licoisoflavanone	Heat shock protein HSP 90
MOL004885	licoisoflavanone	Cell division protein kinase 2
MOL004885	licoisoflavanone	Trypsin-1
MOL004885	licoisoflavanone	Proto-oncogene serine/threonine-protein kinase Pim-1
MOL004885	licoisoflavanone	Cyclin-A2
MOL004885	licoisoflavanone	Nuclear receptor coactivator 1
MOL004885	licoisoflavanone	Calmodulin
MOL004891	shinpterocarpin	Nitric oxide synthase, inducible
MOL004891	shinpterocarpin	Prostaglandin G/H synthase 1
MOL004891	shinpterocarpin	Muscarinic acetylcholine receptor M3
MOL004891	shinpterocarpin	Potassium voltage-gated channel subfamily H member 2
MOL004891	shinpterocarpin	Muscarinic acetylcholine receptor M1
MOL004891	shinpterocarpin	Estrogen receptor
MOL004891	shinpterocarpin	Androgen receptor
MOL004891	shinpterocarpin	Sodium channel protein type 5 subunit alpha
MOL004891	shinpterocarpin	Peroxisome proliferator activated receptor gamma
MOL004891	shinpterocarpin	Prostaglandin G/H synthase 2
MOL004891	shinpterocarpin	5-hydroxytryptamine receptor 3A
MOL004891	shinpterocarpin	Retinoic acid receptor RXR-alpha
MOL004891	shinpterocarpin	Delta-type opioid receptor
MOL004891	shinpterocarpin	Alpha-1B adrenergic receptor
MOL004891	shinpterocarpin	Beta-2 adrenergic receptor
MOL004891	shinpterocarpin	Alpha-1D adrenergic receptor
MOL004891	shinpterocarpin	Mu-type opioid receptor
MOL004891	shinpterocarpin	Estrogen receptor beta
MOL004891	shinpterocarpin	Mitogen-activated protein kinase 14
MOL004891	shinpterocarpin	Glycogen synthase kinase-3 beta
MOL004891	shinpterocarpin	Cell division protein kinase 2
MOL004891	shinpterocarpin	Phosphatidylinositol-4,5-bisphosphate 3-kinase catalytic subunit, gamma isoform
MOL004891	shinpterocarpin	Neuronal acetylcholine receptor protein, alpha-7 chain
MOL004891	shinpterocarpin	mRNA of PKA Catalytic Subunit C-alpha
MOL004891	shinpterocarpin	Retinoic acid receptor RXR-beta
MOL004891	shinpterocarpin	Trypsin-1
MOL004891	shinpterocarpin	Proto-oncogene serine/threonine-protein kinase Pim-1
MOL004891	shinpterocarpin	Cyclin-A2
MOL004891	shinpterocarpin	Nuclear receptor coactivator 1
MOL004891	shinpterocarpin	Calmodulin
MOL004898	(E)-3-[3,4-dihydroxy-5-(3-methylbut-2-enyl)phenyl]-1-(2,4-dihydroxyphenyl)prop-2-en-1-one	Estrogen receptor
MOL004898	(E)-3-[3,4-dihydroxy-5-(3-methylbut-2-enyl)phenyl]-1-(2,4-dihydroxyphenyl)prop-2-en-1-one	Androgen receptor
MOL004898	(E)-3-[3,4-dihydroxy-5-(3-methylbut-2-enyl)phenyl]-1-(2,4-dihydroxyphenyl)prop-2-en-1-one	Peroxisome proliferator activated receptor gamma
MOL004898	(E)-3-[3,4-dihydroxy-5-(3-methylbut-2-enyl)phenyl]-1-(2,4-dihydroxyphenyl)prop-2-en-1-one	Prostaglandin G/H synthase 2
MOL004898	(E)-3-[3,4-dihydroxy-5-(3-methylbut-2-enyl)phenyl]-1-(2,4-dihydroxyphenyl)prop-2-en-1-one	Mitogen-activated protein kinase 14
MOL004898	(E)-3-[3,4-dihydroxy-5-(3-methylbut-2-enyl)phenyl]-1-(2,4-dihydroxyphenyl)prop-2-en-1-one	Glycogen synthase kinase-3 beta
MOL004898	(E)-3-[3,4-dihydroxy-5-(3-methylbut-2-enyl)phenyl]-1-(2,4-dihydroxyphenyl)prop-2-en-1-one	Heat shock protein HSP 90
MOL004898	(E)-3-[3,4-dihydroxy-5-(3-methylbut-2-enyl)phenyl]-1-(2,4-dihydroxyphenyl)prop-2-en-1-one	Cell division protein kinase 2
MOL004898	(E)-3-[3,4-dihydroxy-5-(3-methylbut-2-enyl)phenyl]-1-(2,4-dihydroxyphenyl)prop-2-en-1-one	Proto-oncogene serine/threonine-protein kinase Pim-1
MOL004898	(E)-3-[3,4-dihydroxy-5-(3-methylbut-2-enyl)phenyl]-1-(2,4-dihydroxyphenyl)prop-2-en-1-one	Cyclin-A2
MOL004898	(E)-3-[3,4-dihydroxy-5-(3-methylbut-2-enyl)phenyl]-1-(2,4-dihydroxyphenyl)prop-2-en-1-one	Nuclear receptor coactivator 2
MOL004898	(E)-3-[3,4-dihydroxy-5-(3-methylbut-2-enyl)phenyl]-1-(2,4-dihydroxyphenyl)prop-2-en-1-one	Calmodulin
MOL004903	liquiritin	Coagulation factor Xa
MOL004903	liquiritin	Coagulation factor VII
MOL004903	liquiritin	Calmodulin
MOL004903	liquiritin	Prostaglandin G/H synthase 2
MOL004903	liquiritin	Vascular endothelial growth factor receptor 2
MOL004903	liquiritin	Superoxide dismutase [Cu-Zn]
MOL004904	licopyranocoumarin	Nitric oxide synthase, inducible
MOL004904	licopyranocoumarin	Thrombin
MOL004904	licopyranocoumarin	Estrogen receptor
MOL004904	licopyranocoumarin	Androgen receptor
MOL004904	licopyranocoumarin	Peroxisome proliferator activated receptor gamma
MOL004904	licopyranocoumarin	Coagulation factor Xa
MOL004904	licopyranocoumarin	Prostaglandin G/H synthase 2
MOL004904	licopyranocoumarin	Coagulation factor VII
MOL004904	licopyranocoumarin	Vascular endothelial growth factor receptor 2
MOL004904	licopyranocoumarin	Acetylcholinesterase
MOL004904	licopyranocoumarin	DNA topoisomerase II
MOL004904	licopyranocoumarin	Cell division protein kinase 2
MOL004904	licopyranocoumarin	Trypsin-1
MOL004904	licopyranocoumarin	Proto-oncogene serine/threonine-protein kinase Pim-1
MOL004904	licopyranocoumarin	Cyclin-A2
MOL004904	licopyranocoumarin	Calmodulin
MOL004907	Glyzaglabrin	Nitric oxide synthase, inducible
MOL004907	Glyzaglabrin	Prostaglandin G/H synthase 1
MOL004907	Glyzaglabrin	Estrogen receptor
MOL004907	Glyzaglabrin	Androgen receptor
MOL004907	Glyzaglabrin	Peroxisome proliferator activated receptor gamma
MOL004907	Glyzaglabrin	Prostaglandin G/H synthase 2
MOL004907	Glyzaglabrin	Estrogen receptor beta
MOL004907	Glyzaglabrin	Dipeptidyl peptidase IV
MOL004907	Glyzaglabrin	Mitogen-activated protein kinase 14
MOL004907	Glyzaglabrin	Glycogen synthase kinase-3 beta
MOL004907	Glyzaglabrin	Heat shock protein HSP 90
MOL004907	Glyzaglabrin	Cell division protein kinase 2
MOL004907	Glyzaglabrin	Phosphatidylinositol-4,5-bisphosphate 3-kinase catalytic subunit, gamma isoform
MOL004907	Glyzaglabrin	Serine/threonine-protein kinase Chk1
MOL004907	Glyzaglabrin	mRNA of PKA Catalytic Subunit C-alpha
MOL004907	Glyzaglabrin	Trypsin-1
MOL004907	Glyzaglabrin	Proto-oncogene serine/threonine-protein kinase Pim-1
MOL004907	Glyzaglabrin	Cyclin-A2
MOL004908	Glabridin	Nitric oxide synthase, inducible
MOL004908	Glabridin	Muscarinic acetylcholine receptor M1
MOL004908	Glabridin	Estrogen receptor
MOL004908	Glabridin	Androgen receptor
MOL004908	Glabridin	Sodium channel protein type 5 subunit alpha
MOL004908	Glabridin	Peroxisome proliferator activated receptor gamma
MOL004908	Glabridin	Prostaglandin G/H synthase 2
MOL004908	Glabridin	Retinoic acid receptor RXR-alpha
MOL004908	Glabridin	Acetylcholinesterase
MOL004908	Glabridin	Alpha-1B adrenergic receptor
MOL004908	Glabridin	Beta-2 adrenergic receptor
MOL004908	Glabridin	Estrogen receptor beta
MOL004908	Glabridin	Mitogen-activated protein kinase 14
MOL004908	Glabridin	Glycogen synthase kinase-3 beta
MOL004908	Glabridin	Cell division protein kinase 2
MOL004908	Glabridin	Serine/threonine-protein kinase Chk1
MOL004908	Glabridin	mRNA of PKA Catalytic Subunit C-alpha
MOL004908	Glabridin	Retinoic acid receptor RXR-beta
MOL004908	Glabridin	Ig gamma-1 chain C region
MOL004908	Glabridin	Trypsin-1
MOL004908	Glabridin	Proto-oncogene serine/threonine-protein kinase Pim-1
MOL004908	Glabridin	Cyclin-A2
MOL004908	Glabridin	Nuclear receptor coactivator 2
MOL004908	Glabridin	Nuclear receptor coactivator 1
MOL004908	Glabridin	Calmodulin
MOL004910	Glabranin	Nitric oxide synthase, inducible
MOL004910	Glabranin	Prostaglandin G/H synthase 1
MOL004910	Glabranin	Estrogen receptor
MOL004910	Glabranin	Sodium channel protein type 5 subunit alpha
MOL004910	Glabranin	Coagulation factor Xa
MOL004910	Glabranin	Prostaglandin G/H synthase 2
MOL004910	Glabranin	Nitric-oxide synthase, endothelial
MOL004910	Glabranin	CGMP-inhibited 3',5'-cyclic phosphodiesterase A
MOL004910	Glabranin	Heat shock protein HSP 90
MOL004910	Glabranin	mRNA of PKA Catalytic Subunit C-alpha
MOL004910	Glabranin	Calmodulin
MOL004911	Glabrene	Nitric oxide synthase, inducible
MOL004911	Glabrene	Prostaglandin G/H synthase 1
MOL004911	Glabrene	Estrogen receptor
MOL004911	Glabrene	Androgen receptor
MOL004911	Glabrene	Sodium channel protein type 5 subunit alpha
MOL004911	Glabrene	Peroxisome proliferator activated receptor gamma
MOL004911	Glabrene	Coagulation factor Xa
MOL004911	Glabrene	Prostaglandin G/H synthase 2
MOL004911	Glabrene	Retinoic acid receptor RXR-alpha
MOL004911	Glabrene	Beta-2 adrenergic receptor
MOL004911	Glabrene	Estrogen receptor beta
MOL004911	Glabrene	Mitogen-activated protein kinase 14
MOL004911	Glabrene	Glycogen synthase kinase-3 beta
MOL004911	Glabrene	Heat shock protein HSP 90
MOL004911	Glabrene	Cell division protein kinase 2
MOL004911	Glabrene	Trypsin-1
MOL004911	Glabrene	Proto-oncogene serine/threonine-protein kinase Pim-1
MOL004911	Glabrene	Nuclear receptor coactivator 2
MOL004911	Glabrene	Calmodulin
MOL004912	Glabrone	Nitric oxide synthase, inducible
MOL004912	Glabrone	Prostaglandin G/H synthase 1
MOL004912	Glabrone	Thrombin
MOL004912	Glabrone	Estrogen receptor
MOL004912	Glabrone	Androgen receptor
MOL004912	Glabrone	Sodium channel protein type 5 subunit alpha
MOL004912	Glabrone	Peroxisome proliferator activated receptor gamma
MOL004912	Glabrone	Coagulation factor Xa
MOL004912	Glabrone	Prostaglandin G/H synthase 2
MOL004912	Glabrone	Retinoic acid receptor RXR-alpha
MOL004912	Glabrone	Acetylcholinesterase
MOL004912	Glabrone	Estrogen receptor beta
MOL004912	Glabrone	Dipeptidyl peptidase IV
MOL004912	Glabrone	Mitogen-activated protein kinase 14
MOL004912	Glabrone	Glycogen synthase kinase-3 beta
MOL004912	Glabrone	Cell division protein kinase 2
MOL004912	Glabrone	Serine/threonine-protein kinase Chk1
MOL004912	Glabrone	Trypsin-1
MOL004912	Glabrone	Proto-oncogene serine/threonine-protein kinase Pim-1
MOL004912	Glabrone	Cyclin-A2
MOL004912	Glabrone	Calmodulin
MOL004913	1,3-dihydroxy-9-methoxy-6-benzofurano[3,2-c]chromenone	Estrogen receptor
MOL004913	1,3-dihydroxy-9-methoxy-6-benzofurano[3,2-c]chromenone	Peroxisome proliferator activated receptor gamma
MOL004913	1,3-dihydroxy-9-methoxy-6-benzofurano[3,2-c]chromenone	Estrogen receptor beta
MOL004913	1,3-dihydroxy-9-methoxy-6-benzofurano[3,2-c]chromenone	Mitogen-activated protein kinase 14
MOL004913	1,3-dihydroxy-9-methoxy-6-benzofurano[3,2-c]chromenone	Glycogen synthase kinase-3 beta
MOL004913	1,3-dihydroxy-9-methoxy-6-benzofurano[3,2-c]chromenone	Heat shock protein HSP 90
MOL004913	1,3-dihydroxy-9-methoxy-6-benzofurano[3,2-c]chromenone	Cell division protein kinase 2
MOL004913	1,3-dihydroxy-9-methoxy-6-benzofurano[3,2-c]chromenone	Serine/threonine-protein kinase Chk1
MOL004913	1,3-dihydroxy-9-methoxy-6-benzofurano[3,2-c]chromenone	mRNA of PKA Catalytic Subunit C-alpha
MOL004913	1,3-dihydroxy-9-methoxy-6-benzofurano[3,2-c]chromenone	Cyclin-A2
MOL004914	1,3-dihydroxy-8,9-dimethoxy-6-benzofurano[3,2-c]chromenone	Estrogen receptor
MOL004914	1,3-dihydroxy-8,9-dimethoxy-6-benzofurano[3,2-c]chromenone	Androgen receptor
MOL004914	1,3-dihydroxy-8,9-dimethoxy-6-benzofurano[3,2-c]chromenone	Peroxisome proliferator activated receptor gamma
MOL004914	1,3-dihydroxy-8,9-dimethoxy-6-benzofurano[3,2-c]chromenone	Mitogen-activated protein kinase 14
MOL004914	1,3-dihydroxy-8,9-dimethoxy-6-benzofurano[3,2-c]chromenone	Glycogen synthase kinase-3 beta
MOL004914	1,3-dihydroxy-8,9-dimethoxy-6-benzofurano[3,2-c]chromenone	Heat shock protein HSP 90
MOL004914	1,3-dihydroxy-8,9-dimethoxy-6-benzofurano[3,2-c]chromenone	Cell division protein kinase 2
MOL004914	1,3-dihydroxy-8,9-dimethoxy-6-benzofurano[3,2-c]chromenone	Serine/threonine-protein kinase Chk1
MOL004914	1,3-dihydroxy-8,9-dimethoxy-6-benzofurano[3,2-c]chromenone	mRNA of PKA Catalytic Subunit C-alpha
MOL004915	Eurycarpin A	Nitric oxide synthase, inducible
MOL004915	Eurycarpin A	Thrombin
MOL004915	Eurycarpin A	Estrogen receptor
MOL004915	Eurycarpin A	Androgen receptor
MOL004915	Eurycarpin A	Sodium channel protein type 5 subunit alpha
MOL004915	Eurycarpin A	Peroxisome proliferator activated receptor gamma
MOL004915	Eurycarpin A	Coagulation factor Xa
MOL004915	Eurycarpin A	Prostaglandin G/H synthase 2
MOL004915	Eurycarpin A	Estrogen receptor beta
MOL004915	Eurycarpin A	Dipeptidyl peptidase IV
MOL004915	Eurycarpin A	Mitogen-activated protein kinase 14
MOL004915	Eurycarpin A	Glycogen synthase kinase-3 beta
MOL004915	Eurycarpin A	Heat shock protein HSP 90
MOL004915	Eurycarpin A	Cell division protein kinase 2
MOL004915	Eurycarpin A	Serine/threonine-protein kinase Chk1
MOL004915	Eurycarpin A	Trypsin-1
MOL004915	Eurycarpin A	Proto-oncogene serine/threonine-protein kinase Pim-1
MOL004915	Eurycarpin A	Cyclin-A2
MOL004915	Eurycarpin A	Calmodulin
MOL004924	(-)-Medicocarpin	Prostaglandin G/H synthase 2
MOL004924	(-)-Medicocarpin	Acetylcholinesterase
MOL004935	Sigmoidin-B	Estrogen receptor
MOL004935	Sigmoidin-B	Coagulation factor Xa
MOL004935	Sigmoidin-B	Prostaglandin G/H synthase 2
MOL004935	Sigmoidin-B	Vascular endothelial growth factor receptor 2
MOL004935	Sigmoidin-B	Heat shock protein HSP 90
MOL004935	Sigmoidin-B	Calmodulin
MOL004941	(2R)-7-hydroxy-2-(4-hydroxyphenyl)chroman-4-one	Prostaglandin G/H synthase 1
MOL004941	(2R)-7-hydroxy-2-(4-hydroxyphenyl)chroman-4-one	Estrogen receptor
MOL004941	(2R)-7-hydroxy-2-(4-hydroxyphenyl)chroman-4-one	Prostaglandin G/H synthase 2
MOL004941	(2R)-7-hydroxy-2-(4-hydroxyphenyl)chroman-4-one	Retinoic acid receptor RXR-alpha
MOL004941	(2R)-7-hydroxy-2-(4-hydroxyphenyl)chroman-4-one	CGMP-inhibited 3',5'-cyclic phosphodiesterase A
MOL004941	(2R)-7-hydroxy-2-(4-hydroxyphenyl)chroman-4-one	Beta-2 adrenergic receptor
MOL004941	(2R)-7-hydroxy-2-(4-hydroxyphenyl)chroman-4-one	Heat shock protein HSP 90
MOL004941	(2R)-7-hydroxy-2-(4-hydroxyphenyl)chroman-4-one	Phosphatidylinositol-4,5-bisphosphate 3-kinase catalytic subunit, gamma isoform
MOL004941	(2R)-7-hydroxy-2-(4-hydroxyphenyl)chroman-4-one	Beta-lactamase
MOL004941	(2R)-7-hydroxy-2-(4-hydroxyphenyl)chroman-4-one	Amine oxidase [flavin-containing] B
MOL004941	(2R)-7-hydroxy-2-(4-hydroxyphenyl)chroman-4-one	mRNA of PKA Catalytic Subunit C-alpha
MOL004941	(2R)-7-hydroxy-2-(4-hydroxyphenyl)chroman-4-one	cAMP-dependent protein kinase inhibitor alpha
MOL004941	(2R)-7-hydroxy-2-(4-hydroxyphenyl)chroman-4-one	Calmodulin
MOL004941	(2R)-7-hydroxy-2-(4-hydroxyphenyl)chroman-4-one	Gamma-aminobutyric acid receptor subunit alpha-1
MOL004941	(2R)-7-hydroxy-2-(4-hydroxyphenyl)chroman-4-one	Sodium-dependent serotonin transporter
MOL004945	(2S)-7-hydroxy-2-(4-hydroxyphenyl)-8-(3-methylbut-2-enyl)chroman-4-one	Nitric oxide synthase, inducible
MOL004945	(2S)-7-hydroxy-2-(4-hydroxyphenyl)-8-(3-methylbut-2-enyl)chroman-4-one	Prostaglandin G/H synthase 1
MOL004945	(2S)-7-hydroxy-2-(4-hydroxyphenyl)-8-(3-methylbut-2-enyl)chroman-4-one	Estrogen receptor
MOL004945	(2S)-7-hydroxy-2-(4-hydroxyphenyl)-8-(3-methylbut-2-enyl)chroman-4-one	Sodium channel protein type 5 subunit alpha
MOL004945	(2S)-7-hydroxy-2-(4-hydroxyphenyl)-8-(3-methylbut-2-enyl)chroman-4-one	Coagulation factor Xa
MOL004945	(2S)-7-hydroxy-2-(4-hydroxyphenyl)-8-(3-methylbut-2-enyl)chroman-4-one	Prostaglandin G/H synthase 2
MOL004945	(2S)-7-hydroxy-2-(4-hydroxyphenyl)-8-(3-methylbut-2-enyl)chroman-4-one	CGMP-inhibited 3',5'-cyclic phosphodiesterase A
MOL004945	(2S)-7-hydroxy-2-(4-hydroxyphenyl)-8-(3-methylbut-2-enyl)chroman-4-one	Alpha-1B adrenergic receptor
MOL004945	(2S)-7-hydroxy-2-(4-hydroxyphenyl)-8-(3-methylbut-2-enyl)chroman-4-one	Beta-2 adrenergic receptor
MOL004945	(2S)-7-hydroxy-2-(4-hydroxyphenyl)-8-(3-methylbut-2-enyl)chroman-4-one	Estrogen receptor beta
MOL004945	(2S)-7-hydroxy-2-(4-hydroxyphenyl)-8-(3-methylbut-2-enyl)chroman-4-one	Heat shock protein HSP 90
MOL004945	(2S)-7-hydroxy-2-(4-hydroxyphenyl)-8-(3-methylbut-2-enyl)chroman-4-one	Calmodulin
MOL004948	Isoglycyrol	Nitric oxide synthase, inducible
MOL004948	Isoglycyrol	Estrogen receptor
MOL004948	Isoglycyrol	Androgen receptor
MOL004948	Isoglycyrol	Prostaglandin G/H synthase 2
MOL004948	Isoglycyrol	Dipeptidyl peptidase IV
MOL004948	Isoglycyrol	Glycogen synthase kinase-3 beta
MOL004948	Isoglycyrol	Proto-oncogene serine/threonine-protein kinase Pim-1
MOL004949	Isolicoflavonol	Nitric oxide synthase, inducible
MOL004949	Isolicoflavonol	Thrombin
MOL004949	Isolicoflavonol	Estrogen receptor
MOL004949	Isolicoflavonol	Androgen receptor
MOL004949	Isolicoflavonol	Peroxisome proliferator activated receptor gamma
MOL004949	Isolicoflavonol	Coagulation factor Xa
MOL004949	Isolicoflavonol	Prostaglandin G/H synthase 2
MOL004949	Isolicoflavonol	Glycogen synthase kinase-3 beta
MOL004949	Isolicoflavonol	Heat shock protein HSP 90
MOL004949	Isolicoflavonol	Cell division protein kinase 2
MOL004949	Isolicoflavonol	Trypsin-1
MOL004949	Isolicoflavonol	Proto-oncogene serine/threonine-protein kinase Pim-1
MOL004949	Isolicoflavonol	Cyclin-A2
MOL004949	Isolicoflavonol	Nuclear receptor coactivator 2
MOL004949	Isolicoflavonol	Calmodulin
MOL004957	HMO	Nitric oxide synthase, inducible
MOL004957	HMO	Prostaglandin G/H synthase 1
MOL004957	HMO	Muscarinic acetylcholine receptor M1
MOL004957	HMO	Estrogen receptor
MOL004957	HMO	Androgen receptor
MOL004957	HMO	Sodium channel protein type 5 subunit alpha
MOL004957	HMO	Peroxisome proliferator activated receptor gamma
MOL004957	HMO	Prostaglandin G/H synthase 2
MOL004957	HMO	Retinoic acid receptor RXR-alpha
MOL004957	HMO	CGMP-inhibited 3',5'-cyclic phosphodiesterase A
MOL004957	HMO	Sodium-dependent dopamine transporter
MOL004957	HMO	Beta-2 adrenergic receptor
MOL004957	HMO	Sodium-dependent serotonin transporter
MOL004957	HMO	Estrogen receptor beta
MOL004957	HMO	Dipeptidyl peptidase IV
MOL004957	HMO	Mitogen-activated protein kinase 14
MOL004957	HMO	Glycogen synthase kinase-3 beta
MOL004957	HMO	Cell division protein kinase 2
MOL004957	HMO	Amine oxidase [flavin-containing] B
MOL004957	HMO	Serine/threonine-protein kinase Chk1
MOL004957	HMO	mRNA of PKA Catalytic Subunit C-alpha
MOL004957	HMO	Ig gamma-1 chain C region
MOL004957	HMO	Trypsin-1
MOL004957	HMO	Proto-oncogene serine/threonine-protein kinase Pim-1
MOL004957	HMO	Cyclin-A2
MOL004957	HMO	cAMP-dependent protein kinase inhibitor alpha
MOL004957	HMO	Calmodulin
MOL004959	1-Methoxyphaseollidin	Nitric oxide synthase, inducible
MOL004959	1-Methoxyphaseollidin	Prostaglandin G/H synthase 1
MOL004959	1-Methoxyphaseollidin	Thrombin
MOL004959	1-Methoxyphaseollidin	Potassium voltage-gated channel subfamily H member 2
MOL004959	1-Methoxyphaseollidin	Estrogen receptor
MOL004959	1-Methoxyphaseollidin	Androgen receptor
MOL004959	1-Methoxyphaseollidin	Sodium channel protein type 5 subunit alpha
MOL004959	1-Methoxyphaseollidin	Peroxisome proliferator activated receptor gamma
MOL004959	1-Methoxyphaseollidin	Coagulation factor Xa
MOL004959	1-Methoxyphaseollidin	Prostaglandin G/H synthase 2
MOL004959	1-Methoxyphaseollidin	Nitric-oxide synthase, endothelial
MOL004959	1-Methoxyphaseollidin	Vascular endothelial growth factor receptor 2
MOL004959	1-Methoxyphaseollidin	Retinoic acid receptor RXR-alpha
MOL004959	1-Methoxyphaseollidin	Alpha-1B adrenergic receptor
MOL004959	1-Methoxyphaseollidin	Beta-2 adrenergic receptor
MOL004959	1-Methoxyphaseollidin	Alpha-1D adrenergic receptor
MOL004959	1-Methoxyphaseollidin	DNA topoisomerase II
MOL004959	1-Methoxyphaseollidin	Estrogen receptor beta
MOL004959	1-Methoxyphaseollidin	Mitogen-activated protein kinase 14
MOL004959	1-Methoxyphaseollidin	Glycogen synthase kinase-3 beta
MOL004959	1-Methoxyphaseollidin	Heat shock protein HSP 90
MOL004959	1-Methoxyphaseollidin	Cell division protein kinase 2
MOL004959	1-Methoxyphaseollidin	Phosphatidylinositol-4,5-bisphosphate 3-kinase catalytic subunit, gamma isoform
MOL004959	1-Methoxyphaseollidin	Trypsin-1
MOL004959	1-Methoxyphaseollidin	Proto-oncogene serine/threonine-protein kinase Pim-1
MOL004959	1-Methoxyphaseollidin	Cyclin-A2
MOL004959	1-Methoxyphaseollidin	Nuclear receptor coactivator 2
MOL004959	1-Methoxyphaseollidin	Nuclear receptor coactivator 1
MOL004959	1-Methoxyphaseollidin	Calmodulin
MOL004961	Quercetin der.	Nitric oxide synthase, inducible
MOL004961	Quercetin der.	Prostaglandin G/H synthase 1
MOL004961	Quercetin der.	Estrogen receptor
MOL004961	Quercetin der.	Androgen receptor
MOL004961	Quercetin der.	Sodium channel protein type 5 subunit alpha
MOL004961	Quercetin der.	Peroxisome proliferator activated receptor gamma
MOL004961	Quercetin der.	Prostaglandin G/H synthase 2
MOL004961	Quercetin der.	mRNA of Protein-tyrosine phosphatase, non-receptor type 1
MOL004961	Quercetin der.	Estrogen receptor beta
MOL004961	Quercetin der.	Dipeptidyl peptidase IV
MOL004961	Quercetin der.	Mitogen-activated protein kinase 14
MOL004961	Quercetin der.	Glycogen synthase kinase-3 beta
MOL004961	Quercetin der.	Heat shock protein HSP 90
MOL004961	Quercetin der.	Cell division protein kinase 2
MOL004961	Quercetin der.	Trypsin-1
MOL004961	Quercetin der.	Nuclear receptor coactivator 2
MOL004961	Quercetin der.	Calmodulin
MOL004966	3'-Hydroxy-4'-O-Methylglabridin	Nitric oxide synthase, inducible
MOL004966	3'-Hydroxy-4'-O-Methylglabridin	Prostaglandin G/H synthase 1
MOL004966	3'-Hydroxy-4'-O-Methylglabridin	Potassium voltage-gated channel subfamily H member 2
MOL004966	3'-Hydroxy-4'-O-Methylglabridin	Estrogen receptor
MOL004966	3'-Hydroxy-4'-O-Methylglabridin	Androgen receptor
MOL004966	3'-Hydroxy-4'-O-Methylglabridin	Sodium channel protein type 5 subunit alpha
MOL004966	3'-Hydroxy-4'-O-Methylglabridin	Peroxisome proliferator activated receptor gamma
MOL004966	3'-Hydroxy-4'-O-Methylglabridin	Coagulation factor Xa
MOL004966	3'-Hydroxy-4'-O-Methylglabridin	Prostaglandin G/H synthase 2
MOL004966	3'-Hydroxy-4'-O-Methylglabridin	Coagulation factor VII
MOL004966	3'-Hydroxy-4'-O-Methylglabridin	Vascular endothelial growth factor receptor 2
MOL004966	3'-Hydroxy-4'-O-Methylglabridin	Alpha-1B adrenergic receptor
MOL004966	3'-Hydroxy-4'-O-Methylglabridin	Beta-2 adrenergic receptor
MOL004966	3'-Hydroxy-4'-O-Methylglabridin	DNA topoisomerase II
MOL004966	3'-Hydroxy-4'-O-Methylglabridin	Estrogen receptor beta
MOL004966	3'-Hydroxy-4'-O-Methylglabridin	Mitogen-activated protein kinase 14
MOL004966	3'-Hydroxy-4'-O-Methylglabridin	Glycogen synthase kinase-3 beta
MOL004966	3'-Hydroxy-4'-O-Methylglabridin	Heat shock protein HSP 90
MOL004966	3'-Hydroxy-4'-O-Methylglabridin	Cell division protein kinase 2
MOL004966	3'-Hydroxy-4'-O-Methylglabridin	Serine/threonine-protein kinase Chk1
MOL004966	3'-Hydroxy-4'-O-Methylglabridin	mRNA of PKA Catalytic Subunit C-alpha
MOL004966	3'-Hydroxy-4'-O-Methylglabridin	Trypsin-1
MOL004966	3'-Hydroxy-4'-O-Methylglabridin	Proto-oncogene serine/threonine-protein kinase Pim-1
MOL004966	3'-Hydroxy-4'-O-Methylglabridin	Cyclin-A2
MOL004966	3'-Hydroxy-4'-O-Methylglabridin	Nuclear receptor coactivator 2
MOL004966	3'-Hydroxy-4'-O-Methylglabridin	Nuclear receptor coactivator 1
MOL004966	3'-Hydroxy-4'-O-Methylglabridin	Calcium-activated potassium channel subunit alpha 1
MOL004966	3'-Hydroxy-4'-O-Methylglabridin	Calmodulin
MOL004974	3'-Methoxyglabridin	Nitric oxide synthase, inducible
MOL004974	3'-Methoxyglabridin	Prostaglandin G/H synthase 1
MOL004974	3'-Methoxyglabridin	Potassium voltage-gated channel subfamily H member 2
MOL004974	3'-Methoxyglabridin	Estrogen receptor
MOL004974	3'-Methoxyglabridin	Androgen receptor
MOL004974	3'-Methoxyglabridin	Sodium channel protein type 5 subunit alpha
MOL004974	3'-Methoxyglabridin	Peroxisome proliferator activated receptor gamma
MOL004974	3'-Methoxyglabridin	Coagulation factor Xa
MOL004974	3'-Methoxyglabridin	Prostaglandin G/H synthase 2
MOL004974	3'-Methoxyglabridin	Coagulation factor VII
MOL004974	3'-Methoxyglabridin	Retinoic acid receptor RXR-alpha
MOL004974	3'-Methoxyglabridin	Acetylcholinesterase
MOL004974	3'-Methoxyglabridin	Alpha-1B adrenergic receptor
MOL004974	3'-Methoxyglabridin	Beta-2 adrenergic receptor
MOL004974	3'-Methoxyglabridin	DNA topoisomerase II
MOL004974	3'-Methoxyglabridin	Estrogen receptor beta
MOL004974	3'-Methoxyglabridin	Mitogen-activated protein kinase 14
MOL004974	3'-Methoxyglabridin	Glycogen synthase kinase-3 beta
MOL004974	3'-Methoxyglabridin	Heat shock protein HSP 90
MOL004974	3'-Methoxyglabridin	Cell division protein kinase 2
MOL004974	3'-Methoxyglabridin	Serine/threonine-protein kinase Chk1
MOL004974	3'-Methoxyglabridin	Trypsin-1
MOL004974	3'-Methoxyglabridin	Proto-oncogene serine/threonine-protein kinase Pim-1
MOL004974	3'-Methoxyglabridin	Cyclin-A2
MOL004974	3'-Methoxyglabridin	Nuclear receptor coactivator 2
MOL004974	3'-Methoxyglabridin	Nuclear receptor coactivator 1
MOL004974	3'-Methoxyglabridin	Calcium-activated potassium channel subunit alpha 1
MOL004974	3'-Methoxyglabridin	Calmodulin
MOL004978	2-[(3R)-8,8-dimethyl-3,4-dihydro-2H-pyrano[6,5-f]chromen-3-yl]-5-methoxyphenol	Nitric oxide synthase, inducible
MOL004978	2-[(3R)-8,8-dimethyl-3,4-dihydro-2H-pyrano[6,5-f]chromen-3-yl]-5-methoxyphenol	Prostaglandin G/H synthase 1
MOL004978	2-[(3R)-8,8-dimethyl-3,4-dihydro-2H-pyrano[6,5-f]chromen-3-yl]-5-methoxyphenol	Muscarinic acetylcholine receptor M3
MOL004978	2-[(3R)-8,8-dimethyl-3,4-dihydro-2H-pyrano[6,5-f]chromen-3-yl]-5-methoxyphenol	Potassium voltage-gated channel subfamily H member 2
MOL004978	2-[(3R)-8,8-dimethyl-3,4-dihydro-2H-pyrano[6,5-f]chromen-3-yl]-5-methoxyphenol	Muscarinic acetylcholine receptor M1
MOL004978	2-[(3R)-8,8-dimethyl-3,4-dihydro-2H-pyrano[6,5-f]chromen-3-yl]-5-methoxyphenol	Estrogen receptor
MOL004978	2-[(3R)-8,8-dimethyl-3,4-dihydro-2H-pyrano[6,5-f]chromen-3-yl]-5-methoxyphenol	Androgen receptor
MOL004978	2-[(3R)-8,8-dimethyl-3,4-dihydro-2H-pyrano[6,5-f]chromen-3-yl]-5-methoxyphenol	Sodium channel protein type 5 subunit alpha
MOL004978	2-[(3R)-8,8-dimethyl-3,4-dihydro-2H-pyrano[6,5-f]chromen-3-yl]-5-methoxyphenol	Peroxisome proliferator activated receptor gamma
MOL004978	2-[(3R)-8,8-dimethyl-3,4-dihydro-2H-pyrano[6,5-f]chromen-3-yl]-5-methoxyphenol	Coagulation factor Xa
MOL004978	2-[(3R)-8,8-dimethyl-3,4-dihydro-2H-pyrano[6,5-f]chromen-3-yl]-5-methoxyphenol	Prostaglandin G/H synthase 2
MOL004978	2-[(3R)-8,8-dimethyl-3,4-dihydro-2H-pyrano[6,5-f]chromen-3-yl]-5-methoxyphenol	Nitric-oxide synthase, endothelial
MOL004978	2-[(3R)-8,8-dimethyl-3,4-dihydro-2H-pyrano[6,5-f]chromen-3-yl]-5-methoxyphenol	Retinoic acid receptor RXR-alpha
MOL004978	2-[(3R)-8,8-dimethyl-3,4-dihydro-2H-pyrano[6,5-f]chromen-3-yl]-5-methoxyphenol	Acetylcholinesterase
MOL004978	2-[(3R)-8,8-dimethyl-3,4-dihydro-2H-pyrano[6,5-f]chromen-3-yl]-5-methoxyphenol	Alpha-1B adrenergic receptor
MOL004978	2-[(3R)-8,8-dimethyl-3,4-dihydro-2H-pyrano[6,5-f]chromen-3-yl]-5-methoxyphenol	Sodium-dependent dopamine transporter
MOL004978	2-[(3R)-8,8-dimethyl-3,4-dihydro-2H-pyrano[6,5-f]chromen-3-yl]-5-methoxyphenol	Beta-2 adrenergic receptor
MOL004978	2-[(3R)-8,8-dimethyl-3,4-dihydro-2H-pyrano[6,5-f]chromen-3-yl]-5-methoxyphenol	Estrogen receptor beta
MOL004978	2-[(3R)-8,8-dimethyl-3,4-dihydro-2H-pyrano[6,5-f]chromen-3-yl]-5-methoxyphenol	Mitogen-activated protein kinase 14
MOL004978	2-[(3R)-8,8-dimethyl-3,4-dihydro-2H-pyrano[6,5-f]chromen-3-yl]-5-methoxyphenol	Glycogen synthase kinase-3 beta
MOL004978	2-[(3R)-8,8-dimethyl-3,4-dihydro-2H-pyrano[6,5-f]chromen-3-yl]-5-methoxyphenol	Cell division protein kinase 2
MOL004978	2-[(3R)-8,8-dimethyl-3,4-dihydro-2H-pyrano[6,5-f]chromen-3-yl]-5-methoxyphenol	Serine/threonine-protein kinase Chk1
MOL004978	2-[(3R)-8,8-dimethyl-3,4-dihydro-2H-pyrano[6,5-f]chromen-3-yl]-5-methoxyphenol	mRNA of PKA Catalytic Subunit C-alpha
MOL004978	2-[(3R)-8,8-dimethyl-3,4-dihydro-2H-pyrano[6,5-f]chromen-3-yl]-5-methoxyphenol	Retinoic acid receptor RXR-beta
MOL004978	2-[(3R)-8,8-dimethyl-3,4-dihydro-2H-pyrano[6,5-f]chromen-3-yl]-5-methoxyphenol	Trypsin-1
MOL004978	2-[(3R)-8,8-dimethyl-3,4-dihydro-2H-pyrano[6,5-f]chromen-3-yl]-5-methoxyphenol	Proto-oncogene serine/threonine-protein kinase Pim-1
MOL004978	2-[(3R)-8,8-dimethyl-3,4-dihydro-2H-pyrano[6,5-f]chromen-3-yl]-5-methoxyphenol	Cyclin-A2
MOL004978	2-[(3R)-8,8-dimethyl-3,4-dihydro-2H-pyrano[6,5-f]chromen-3-yl]-5-methoxyphenol	Nuclear receptor coactivator 2
MOL004978	2-[(3R)-8,8-dimethyl-3,4-dihydro-2H-pyrano[6,5-f]chromen-3-yl]-5-methoxyphenol	Nuclear receptor coactivator 1
MOL004978	2-[(3R)-8,8-dimethyl-3,4-dihydro-2H-pyrano[6,5-f]chromen-3-yl]-5-methoxyphenol	Calcium-activated potassium channel subunit alpha 1
MOL004978	2-[(3R)-8,8-dimethyl-3,4-dihydro-2H-pyrano[6,5-f]chromen-3-yl]-5-methoxyphenol	Calmodulin
MOL004980	Inflacoumarin A	Thrombin
MOL004980	Inflacoumarin A	Estrogen receptor
MOL004980	Inflacoumarin A	Androgen receptor
MOL004980	Inflacoumarin A	Peroxisome proliferator activated receptor gamma
MOL004980	Inflacoumarin A	Coagulation factor Xa
MOL004980	Inflacoumarin A	Prostaglandin G/H synthase 2
MOL004980	Inflacoumarin A	Beta-2 adrenergic receptor
MOL004980	Inflacoumarin A	Dipeptidyl peptidase IV
MOL004980	Inflacoumarin A	Heat shock protein HSP 90
MOL004980	Inflacoumarin A	Trypsin-1
MOL004980	Inflacoumarin A	Proto-oncogene serine/threonine-protein kinase Pim-1
MOL004980	Inflacoumarin A	Nuclear receptor coactivator 2
MOL004980	Inflacoumarin A	Calmodulin
MOL004980	Inflacoumarin A	Prostaglandin G/H synthase 1
MOL004980	Inflacoumarin A	Sodium channel protein type 5 subunit alpha
MOL004985	icos-5-enoic acid	Nuclear receptor coactivator 2
MOL004988	Kanzonol F	Estrogen receptor
MOL004988	Kanzonol F	Androgen receptor
MOL004988	Kanzonol F	Coagulation factor Xa
MOL004988	Kanzonol F	Prostaglandin G/H synthase 2
MOL004988	Kanzonol F	Estrogen receptor beta
MOL004988	Kanzonol F	Proto-oncogene serine/threonine-protein kinase Pim-1
MOL004988	Kanzonol F	Nuclear receptor coactivator 2
MOL004988	Kanzonol F	Calmodulin
MOL004989	6-prenylated eriodictyol	Nitric oxide synthase, inducible
MOL004989	6-prenylated eriodictyol	Estrogen receptor
MOL004989	6-prenylated eriodictyol	Sodium channel protein type 5 subunit alpha
MOL004989	6-prenylated eriodictyol	Coagulation factor Xa
MOL004989	6-prenylated eriodictyol	Prostaglandin G/H synthase 2
MOL004989	6-prenylated eriodictyol	Coagulation factor VII
MOL004989	6-prenylated eriodictyol	Heat shock protein HSP 90
MOL004989	6-prenylated eriodictyol	Calmodulin
MOL004990	7,2',4'-trihydroxy－5-methoxy-3－arylcoumarin	Nitric oxide synthase, inducible
MOL004990	7,2',4'-trihydroxy－5-methoxy-3－arylcoumarin	Prostaglandin G/H synthase 1
MOL004990	7,2',4'-trihydroxy－5-methoxy-3－arylcoumarin	Estrogen receptor
MOL004990	7,2',4'-trihydroxy－5-methoxy-3－arylcoumarin	Androgen receptor
MOL004990	7,2',4'-trihydroxy－5-methoxy-3－arylcoumarin	Peroxisome proliferator activated receptor gamma
MOL004990	7,2',4'-trihydroxy－5-methoxy-3－arylcoumarin	Prostaglandin G/H synthase 2
MOL004990	7,2',4'-trihydroxy－5-methoxy-3－arylcoumarin	Estrogen receptor beta
MOL004990	7,2',4'-trihydroxy－5-methoxy-3－arylcoumarin	Dipeptidyl peptidase IV
MOL004990	7,2',4'-trihydroxy－5-methoxy-3－arylcoumarin	Mitogen-activated protein kinase 14
MOL004990	7,2',4'-trihydroxy－5-methoxy-3－arylcoumarin	Glycogen synthase kinase-3 beta
MOL004990	7,2',4'-trihydroxy－5-methoxy-3－arylcoumarin	Heat shock protein HSP 90
MOL004990	7,2',4'-trihydroxy－5-methoxy-3－arylcoumarin	Cell division protein kinase 2
[truncated: 648 more rows]
